# Supplementary material
Source: PubMed Central journal article supplement (PMC6397032)
Supplement: supp_7.1.E124_2018-0152-1-at.pdf [file supp_7.1.E124_2018-0152-1-at.pdf]

**Appendix 1 (as supplied by the authors):** List of Family Medicine Longitudinal Survey questions describing physician characteristics and practice intentions

5. What is your marital status?

- Single
- Married
- Common-law
- Divorced/Separated
- Widowed
- Prefer not to answer

6. Do you have children?

- Yes/Expecting
- No
- Prefer not to answer

7. What is your sex?

- Female
- Male
- Prefer not to answer

8. Select the ONE statement which best describes the environment in which you grew up PRIOR to university.

- a. Exclusively/ predominantly inner city
- b. Exclusively/ predominantly urban/suburban
- c. Exclusively/ predominantly small town
- d. Exclusively/ predominantly rural
- e. Exclusively/ predominantly remote/isolated
- Mixture of environments

9. What year were you awarded your M.D. degree?

...

15. After completing your residency, how likely are you to practice in the following organizational models?

- f. Solo practice
- g. Group physician practice
- h. Interprofessional team-based practice
- i. Practice that includes teaching health profession learners

16. After completing your residency, how likely are you to practice in the following family medicine practice types?

- j. Comprehensive care delivered in one clinical setting. (e.g., office –based)

- k. Comprehensive care provided across multiple clinical settings (in-hospital, long-term care, office).
- l. Comprehensive care that includes a special interest (such as sports medicine, emergency medicine, palliative care, etc.)
- m. I plan to focus only on specific clinical areas (such as sports medicine, maternity care, emergency medicine, palliative care, hospital medicine etc.)

17. In your first three years of practice, do you intend to commit to providing comprehensive care to the same group of patients?

18. If very unlikely or somewhat unlikely, what is your primary reason? (check one only)

19. To what extent do you agree or disagree with the following statement: *“I am confident in my current ability to provide comprehensive care to the same group of patients over time.”*

20. How much exposure have you had to the following domains, practice settings, and specific populations in your medical education to date?

- a. Care across the life cycle
- b. Intrapartum care
- c. Mental health care
- d. Chronic disease management
- e. Palliative Care/End of life
- f. Office-based clinical procedures
- g. In-hospital clinical procedures (e.g. chest tube insertion, adult lumbar puncture, nasogastric tube insertion)
- h. Practice setting – Emergency departments
- i. Practice setting – In-hospital
- j. Practice setting – Care in the home
- k. Practice setting – Long-term care facilities
- l. Marginalized, disadvantaged and vulnerable populations
- m. Rural populations
- n. Elderly populations
- o. Aboriginal populations/First Nations, Inuit and Métis

21. In your future practice as a family physician, how likely are you to provide care in each of the following domains, practice settings, and specific populations in the first 3 years?

- a. Care across the life cycle
- b. Intrapartum care
- c. Mental health care
- d. Chronic disease management
- e. Palliative Care/End of life
- f. Office-based clinical procedures

- g. In-hospital clinical procedures (e.g. chest tube insertion, adult lumbar puncture, nasogastric tube insertion)
- h. Practice setting – Emergency departments
- i. Practice setting – In-hospital
- j. Practice setting – Care in the home
- k. Practice setting – Long-term care facilities
- l. Marginalized, disadvantaged and vulnerable populations
- m. Rural populations
- n. Elderly populations
- o. Aboriginal populations/First Nations, Inuit and Métis

22. To what extent do you agree or disagree with the following statement:

*'I am confident to begin the practice of comprehensive family medicine in any community in Canada.'*
