# Supplementary material
Source: PubMed Central journal article supplement (PMC6397032)
Supplement: supp_7.1.E124_2018-0152-2-at.pdf [file supp_7.1.E124_2018-0152-2-at.pdf]

**Appendix 2 (as supplied by the authors):** Results of multivariable logistic regression exploring odds of practice intentions (OR, 95% CI)

|                                                                       | Intend to provide comprehensive care to the same group of patients within first 3 years | Confident in ability     | Comprehensive care - one clinical setting. (e.g. office) | Comprehensive care - multiple clinical settings | Comprehensive care that includes a special interest |
|-----------------------------------------------------------------------|-----------------------------------------------------------------------------------------|--------------------------|----------------------------------------------------------|-------------------------------------------------|-----------------------------------------------------|
| Western Canada                                                        | <b>0.18 (0.13, 0.25)</b>                                                                | 1.53 (0.95, 2.45)        | <b>1.32 (1.02, 1.71)</b>                                 | 0.83 (0.61, 1.13)                               | 1.13 (0.86, 1.48)                                   |
| Atlantic Canada                                                       | <b>0.07 (0.04, 0.12)</b>                                                                | 0.50 (0.24, 1.05)        | 0.74 (0.43, 1.27)                                        | 1.05 (0.50, 2.19)                               | 1.34 (0.74, 2.43)                                   |
| Quebec                                                                | <b>0.14 (0.10, 0.20)</b>                                                                | 1.55 (0.86, 2.79)        | <b>1.37 (1.00, 1.87)</b>                                 | <b>0.60 (0.42, 0.85)</b>                        | 0.91 (0.66, 1.25)                                   |
| <b>Physician characteristics</b>                                      |                                                                                         |                          |                                                          |                                                 |                                                     |
| Female (reference is male)                                            | 1.12 (0.89, 1.42)                                                                       | 1.12 (0.76, 1.65)        | <b>1.48 (1.19, 1.84)</b>                                 | 1.14 (0.89, 1.47)                               | 0.93 (0.74, 1.16)                                   |
| Missing/prefer not to say                                             | <b>0.33 (0.15, 0.75)</b>                                                                | <b>0.27 (0.11, 0.66)</b> | 1.27 (0.60, 2.72)                                        | 0.96 (0.42, 2.22)                               | 0.75 (0.36, 1.58)                                   |
| IMG (reference is graduate of Canadian school)                        | <b>3.26 (2.21, 4.81)</b>                                                                | 1.04 (0.59, 1.86)        | <b>1.87 (1.31, 2.67)</b>                                 | 0.85 (0.59, 1.23)                               | 1.04 (0.74, 1.45)                                   |
| Missing/prefer not to say                                             | <b>0.30 (0.16, 0.56)</b>                                                                | 0.88 (0.26, 2.13)        | 1.22 (0.67, 2.20)                                        | <b>0.55 (0.30, 0.98)</b>                        | 1.09 (0.62, 1.92)                                   |
| Age (reference is age <30)                                            |                                                                                         |                          |                                                          |                                                 |                                                     |
| 30-34                                                                 | 1.20 (0.92, 1.56)                                                                       | 0.76 (0.48, 1.21)        | 1.00 (0.78, 1.29)                                        | 0.87 (0.65, 1.18)                               | <b>0.75 (0.58, 0.98)</b>                            |
| 35+                                                                   | <b>2.06 (1.37, 3.11)</b>                                                                | 0.54 (0.31, 0.94)        | 1.52 (1.05, 2.19)                                        | 0.75 (0.50, 1.11)                               | 0.74 (0.52, 1.06)                                   |
| Missing/prefer not to say                                             | <b>9.0 (2.21, 36.82)</b>                                                                | 2.23 (0.44, 11.2)        | 0.95 (0.34, 2.63)                                        | 1.44 (0.47, 4.44)                               | 1.77 (0.61, 5.18)                                   |
| Childhood environment (reference is inner city/urban/suburban)        |                                                                                         |                          |                                                          |                                                 |                                                     |
| Small town                                                            | 1.21 (0.88, 1.67)                                                                       | 1.07 (0.63, 1.81)        | <b>0.58 (0.44, 0.77)</b>                                 | 1.40 (0.97, 1.95)                               | 1.08 (0.80, 1.44)                                   |
| Rural/remote/isolated                                                 | 1.40 (0.98, 2.00)                                                                       | 0.86 (0.50, 1.46)        | <b>0.61 (0.45, 0.83)</b>                                 | <b>2.38 (1.47, 3.83)</b>                        | 1.32 (0.94, 1.85)                                   |
| Mixed                                                                 | 1.02 (0.61, 1.70)                                                                       | 1.34 (0.58, 3.05)        | 0.66 (0.42, 1.02)                                        | 0.99 (0.60, 1.61)                               | 1.06 (0.68, 1.66)                                   |
| Missing/prefer not to say                                             | 1.29 (0.34, 4.88)                                                                       | 1.05 (0.17, 6.52)        | 1.22 (0.33, 4.48)                                        | 0.69 (0.18, 2.57)                               | 0.65 (0.19, 2.23)                                   |
| <b>Intention for rural practice</b>                                   |                                                                                         |                          |                                                          |                                                 |                                                     |
| Rural practice somewhat/highly likely (reference is neutral/unlikely) | 1.06 (0.83, 1.35)                                                                       | 1.08 (0.72, 1.60)        | <b>0.51 (0.41, 0.64)</b>                                 | <b>3.25 (2.50, 4.23)</b>                        | <b>1.74 (1.39, 2.17)</b>                            |
| Missing/prefer not to say                                             | <b>0.11 (0.03, 0.47)</b>                                                                | 0.28 (0.06, 1.31)        | 0.88 (0.31, 2.48)                                        | 0.75 (0.24, 2.30)                               | 0.90 (0.31, 2.63)                                   |

**Note:** Estimates significant at  $p \leq 0.05$  are indicated in bold. Estimates for category capturing missing responses/"prefer not to answer" not shown.

**Appendix 2 (continued).** Results of multivariable logistic regression exploring odds of practice intentions (OR, 95% CI)

|                                                                       | Focused practice         | Solo practice             | Group physician practice | Interprofessional team-based practice | Practice that includes teaching |
|-----------------------------------------------------------------------|--------------------------|---------------------------|--------------------------|---------------------------------------|---------------------------------|
| <b>Region of residency</b> (reference is Ontario)                     |                          |                           |                          |                                       |                                 |
| Western Canada                                                        | <b>0.55 (0.42, 0.72)</b> | <b>2.53 (1.43, 4.48)</b>  | <b>0.45 (0.23, 0.87)</b> | <b>0.35 (0.22, 0.56)</b>              | <b>3.81 (2.77, 5.25)</b>        |
| Atlantic Canada                                                       | 0.58 (0.32, 1.04)        | 2.63 (0.99, 6.96)         | <b>0.30 (0.10, 0.88)</b> | 0.46 (0.18, 1.15)                     | <b>1.93 (1.01, 3.71)</b>        |
| Quebec                                                                | <b>0.48 (0.35, 0.67)</b> | <b>3.09 (1.65, 5.78)</b>  | <b>0.28 (0.14, 0.57)</b> | <b>0.26 (0.16, 0.44)</b>              | <b>2.24 (1.57, 3.21)</b>        |
| <b>Physician characteristics</b>                                      |                          |                           |                          |                                       |                                 |
| Female (reference is male)                                            | 0.72 (0.58, 0.90)        | 0.78 (0.53, 1.15)         | <b>2.48 (1.59, 3.85)</b> | <b>2.19 (1.60, 3.01)</b>              | 1.09 (0.84, 1.41)               |
| Missing/prefer not to say                                             | 0.94 (0.44, 2.04)        | 1.23 (0.43, 3.51)         | <b>0.25 (0.11, 0.60)</b> | 0.97 (0.39, 2.40)                     | <b>0.34 (0.15, 0.76)</b>        |
| IMG (reference is graduate of Canadian school)                        | 0.91 (0.64, 1.31)        | 1.50 (0.89, 2.54)         | 1.40 (0.71, 2.78)        | 1.04 (0.65, 1.65)                     | <b>0.64 (0.44, 0.95)</b>        |
| Missing/prefer not to say                                             | 1.00 (0.57, 1.76)        | <b>4.81 (1.93, 11.98)</b> | <b>0.20 (0.07, 0.52)</b> | <b>0.31 (0.14, 0.69)</b>              | 1.75 (0.94, 3.27)               |
| Age (reference is age <30)                                            |                          |                           |                          |                                       |                                 |
| 30-34                                                                 | 0.95 (0.73, 1.23)        | 0.69 (0.43, 1.10)         | 1.09 (0.65, 1.84)        | 0.75 (0.52, 1.08)                     | 1.01 (0.73, 1.39)               |
| 35+                                                                   | <b>0.71 (0.49, 1.03)</b> | 1.05 (0.59, 1.87)         | 0.92 (0.47, 1.80)        | 0.95 (0.57, 1.59)                     | <b>0.65 (0.44, 0.96)</b>        |
| Missing/prefer not to say                                             | 0.75 (0.26, 2.15)        | 3.34 (0.74, 15.18)        | 0.88 (0.20, 3.79)        | 0.86 (0.22, 3.38)                     | 1.23 (0.40, 3.84)               |
| Childhood environment (reference is inner city/urban/suburban)        |                          |                           |                          |                                       |                                 |
| Small town                                                            | 0.95 (0.71, 1.28)        | 0.92 (0.53, 1.62)         | <b>0.54 (0.31, 0.93)</b> | <b>0.62 (0.41, 0.93)</b>              | 0.93 (0.66, 1.30)               |
| Rural/remote/isolated                                                 | 0.84 (0.60, 1.17)        | 1.55 (0.91, 2.65)         | 0.71 (0.36, 1.42)        | 1.09 (0.63, 1.88)                     | 1.19 (0.80, 1.77)               |
| Mixed                                                                 | <b>1.81 (1.18, 2.79)</b> | 0.98 (0.43, 2.23)         | <b>0.44 (0.21, 0.93)</b> | <b>0.43 (0.24, 0.75)</b>              | 1.16 (0.69, 1.94)               |
| Missing/prefer not to say                                             | 0.91 (0.23, 3.59)        | 5.18 (1.39, 19.33)        | 0.90 (0.14, 5.59)        | 0.82 (0.16, 4.13)                     | 2.11 (0.37, 12.16)              |
| <b>Intention for rural practice</b>                                   |                          |                           |                          |                                       |                                 |
| Rural practice somewhat/highly likely (reference is neutral/unlikely) | 1.13 (0.90, 1.42)        | 1.28 (0.85, 1.93)         | 1.26 (0.79, 2.02)        | <b>1.41 (1.01, 1.97)</b>              | <b>1.61 (1.24, 2.09)</b>        |
| Missing/prefer not to say                                             | 1.92 (0.67, 5.55)        | <b>0.15 (0.02, 0.93)</b>  | 0.64 (0.25, 2.79)        | 1.24 (0.31, 4.94)                     | <b>1.61 (1.24, 2.09)</b>        |

**Note:** Estimates significant at  $p \leq 0.05$  are indicated in bold. Estimates for category capturing missing responses/"prefer not to answer" not shown.

**Appendix 2 (continued).** Results of multivariable logistic regression exploring odds of practice intentions (OR, 95% CI)

|                                                                       | Care across the life cycle | Intrapartum care          | Mental health care       | Chronic disease management | Palliative care/end of life care |
|-----------------------------------------------------------------------|----------------------------|---------------------------|--------------------------|----------------------------|----------------------------------|
| <b>Region of residency</b> (reference is Ontario)                     |                            |                           |                          |                            |                                  |
| Western Canada                                                        | 0.72 (0.45, 1.15)          | <b>1.83 (1.40, 2.40)</b>  | 1.26 (0.84, 1.91)        | 1.08 (0.63, 1.83)          | <b>2.61 (1.99, 3.42)</b>         |
| Atlantic Canada                                                       | <b>0.31 (0.14, 0.68)</b>   | 1.48 (0.85, 2.58)         | 1.13 (0.45, 2.82)        | 0.54 (0.20, 1.45)          | <b>2.32 (1.26, 4.27)</b>         |
| Quebec                                                                | 0.78 (0.44, 1.38)          | <b>1.50 (1.09, 2.07)</b>  | 1.05 (0.64, 1.71)        | 0.86 (0.46, 1.61)          | <b>2.05 (1.49, 2.83)</b>         |
| <b>Physician characteristics</b>                                      |                            |                           |                          |                            |                                  |
| Female (reference is male)                                            | <b>1.96 (1.38, 2.80)</b>   | <b>2.64 (2.10, 3.32)</b>  | <b>1.80 (1.30, 2.50)</b> | <b>2.24 (1.48, 3.38)</b>   | 0.84 (0.70, 1.06)                |
| Missing/prefer not to say                                             | 0.36 (0.44, 1.38)          | 1.53 (0.71, 3.30)         | <b>0.40 (0.17, 0.93)</b> | 1.01 (0.30, 3.36)          | 0.65 (0.29, 1.44)                |
| IMG (reference is graduate of Canadian school)                        | 1.79 (0.98, 3.27)          | 0.96 (0.69, 1.34)         | 0.78 (0.48, 1.27)        | 1.82 (0.82, 4.05)          | 0.89 (0.63, 1.27)                |
| Missing/prefer not to say                                             | 0.52 (0.23, 1.16)          | 1.41 (0.78, 2.54)         | <b>0.31 (0.16, 0.58)</b> | <b>0.24 (0.11, 0.50)</b>   | <b>0.40 (0.21, 0.76)</b>         |
| Age (reference is age <30)                                            |                            |                           |                          |                            |                                  |
| 30-34                                                                 | 0.99 (0.64, 1.55)          | 0.91 (0.70, 1.18)         | 0.88 (0.59, 1.32)        | 1.18 (0.71, 1.96)          | 1.04 (0.79, 1.37)                |
| 35+                                                                   | 0.64 (0.37, 1.10)          | 1.20 (0.84, 1.70)         | 0.70 (0.42, 1.14)        | 1.13 (0.57, 2.23)          | 0.83 (0.58, 1.20)                |
| Missing/prefer not to say                                             | 0.48 (0.10, 2.27)          | <b>4.70 (1.09, 20.14)</b> | <b>0.19, 0.05, 0.80)</b> | 0.32 (0.06, 1.81)          | 0.39 (0.10, 1.51)                |
| Childhood environment (reference is inner city/urban/suburban)        |                            |                           |                          |                            |                                  |
| Small town                                                            | 1.05 (0.63, 1.75)          | 0.82 (0.61, 1.10)         | 0.87 (0.55, 1.37)        | 0.93 (0.52, 1.66)          | <b>1.39 (1.03, 1.89)</b>         |
| Rural/remote/isolated                                                 | 0.83 (0.48, 1.45)          | 1.10 (0.81, 1.51)         | 0.82 (0.49, 1.37)        | 0.75 (0.40, 1.42)          | <b>1.43 (1.01, 2.02)</b>         |
| Mixed                                                                 | 0.62 (0.33, 1.17)          | 1.19 (0.76, 1.86)         | 0.64 (0.36, 1.15)        | 0.54 (0.26, 1.14)          | 0.99 (0.63, 1.57)                |
| Missing/prefer not to say                                             | 5.05 (0.48, 53.6)          | 1.00 (0.29, 3.52)         | 1.49 (0.23, 9.62)        | 1.67 (0.15, 18.22)         | 0.56 (0.16, 1.93)                |
| <b>Intention for rural practice</b>                                   |                            |                           |                          |                            |                                  |
| Rural practice somewhat/highly likely (reference is neutral/unlikely) | 2.01 (1.37, 2.95)          | <b>1.82 (1.45, 2.28)</b>  | 2.07 (1.46, 2.93)        | <b>1.89 (1.21, 2.95)</b>   | <b>2.22 (1.77, 2.79)</b>         |
| Missing/prefer not to say                                             | 0.96 (0.18, 5.07)          | 0.25 (0.05, 1.15)         | 4.05 (0.82, 19.86)       | 2.87 (0.41, 20.05)         | 2.38 (0.56, 10.03)               |

**Note:** Estimates significant at  $p \leq 0.05$  are indicated in bold. Estimates for category capturing missing responses/"prefer not to answer" not shown.

**Appendix 2 (continued).** Results of multivariable logistic regression exploring odds of practice intentions (OR, 95% CI)

|                                                                                | Office-based<br>clinical<br>procedures | In-hospital<br>clinical<br>procedures | Emergency<br>departments  | In-hospital              | Care in the home         |
|--------------------------------------------------------------------------------|----------------------------------------|---------------------------------------|---------------------------|--------------------------|--------------------------|
| <b>Region of residency</b> (reference is Ontario)                              |                                        |                                       |                           |                          |                          |
| Western Canada                                                                 | <b>2.22 (1.55, 3.17)</b>               | <b>1.51 (1.14, 2.00)</b>              | <b>1.85 (1.39, 2.47)</b>  | 1.07 (0.82, 1.41)        | <b>1.84 (1.41, 2.40)</b> |
| Atlantic Canada                                                                | 0.82 (0.42, 1.60)                      | 0.84 (0.47, 1.51)                     | 1.51 (0.85, 2.70)         | 1.37 (0.73, 2.58)        | <b>2.17 (1.26, 3.73)</b> |
| Quebec                                                                         | 1.25 (0.84, 1.87)                      | 0.96 (0.68, 1.35)                     | 1.10 (0.78, 1.55)         | 0.59 (0.43, 0.82)        | <b>2.54 (1.86, 3.48)</b> |
| <b>Physician characteristics</b>                                               |                                        |                                       |                           |                          |                          |
| Female<br>(reference is male)                                                  | 1.25 (0.94, 1.66)                      | <b>0.47 (0.37, 0.58)</b>              | 0.40 (0.32, 0.51)         | 0.70 (0.56, 0.88)        | 1.07 (0.86, 1.32)        |
| Missing/prefer not to say                                                      | 0.68 (0.27, 1.69)                      | 0.45 (0.20, 1.02)                     | 0.49 (0.22, 1.12)         | 0.85 (0.37, 1.97)        | 0.85 (0.39, 1.87)        |
| IMG (reference is graduate<br>of Canadian school)                              | 1.53 (0.93, 2.53)                      | <b>0.70 (0.50, 1.00)</b>              | 0.80 (0.56, 1.13)         | 0.98 (0.69, 1.38)        | <b>1.39 (1.01, 1.92)</b> |
| Missing/prefer not to say                                                      | 0.82 (0.44, 1.51)                      | <b>2.66 (1.46, 4.86)</b>              | <b>3.84 (2.09, 7.03)</b>  | <b>0.22 (0.11, 0.43)</b> | <b>2.34 (1.33, 4.11)</b> |
| Age<br>(reference is age <30)                                                  |                                        |                                       |                           |                          |                          |
| 30-34                                                                          | 1.08 (0.76, 1.53)                      | 1.14 (0.87, 1.49)                     | 1.07 (0.81, 1.41)         | 1.09 (0.83, 1.43)        | 0.94 (0.73, 1.21)        |
| 35+                                                                            | 0.83 (0.52, 1.31)                      | 0.77 (0.53, 1.12)                     | 0.82 (0.56, 1.19)         | 0.78 (0.54, 1.13)        | 0.96 (0.68, 1.36)        |
| Missing/prefer not to say                                                      | 0.30 (0.08, 1.20)                      | 0.55 (0.11, 2.85)                     | 0.47 (0.09, 2.48)         | 0.59 (0.15, 2.31)        | 0.13 (0.01, 1.14)        |
| Childhood environment<br>(reference is inner<br>city/urban/suburban)           |                                        |                                       |                           |                          |                          |
| Small town                                                                     | 1.36 (0.91, 2.03)                      | 1.28 (0.95, 1.73)                     | <b>1.53 (1.13, 2.07)</b>  | 1.21 (0.89, 1.64)        | 1.21 (0.92, 1.61)        |
| Rural/remote/isolated                                                          | 1.00 (0.65, 1.54)                      | <b>1.84 (1.33, 2.54)</b>              | <b>1.57 (1.13, 2.18)</b>  | <b>1.61 (1.13, 2.30)</b> | 1.35 (0.99, 1.84)        |
| Mixed                                                                          | 0.89 (0.51, 1.55)                      | <b>1.83 (1.15, 2.90)</b>              | <b>1.64 (1.02, 2.63)</b>  | 0.73 (0.46, 1.15)        | 0.99 (0.63, 1.54)        |
| Missing/prefer not to say                                                      | 2.10 (0.35, 12.55)                     | 0.69 (0.16, 3.00)                     | 0.46 (0.10, 2.07)         | 1.44 (0.37, 5.51)        | 2.52 (0.68, 9.33)        |
| Intention for rural practice                                                   |                                        |                                       |                           |                          |                          |
| Rural practice<br>somewhat/highly likely<br>(reference is<br>neutral/unlikely) | <b>2.01 (1.50, 2.71)</b>               | <b>4.63 (3.62, 5.90)</b>              | <b>5.85 (4.57, 7.50)</b>  | <b>3.96 (3.15, 4.98)</b> | <b>1.99 (1.60, 2.48)</b> |
| Missing/prefer not to say                                                      | 2.51 (0.56, 11.34)                     | <b>6.00 (1.06, 33.88)</b>             | <b>7.64 (1.31, 44.51)</b> | 2.22 (0.76, 1.35)        | 5.10 (0.54, 48.08)       |

**Note:** Estimates significant at  $p \leq 0.05$  are indicated in bold. Estimates for category capturing missing responses/"prefer not to answer" not shown.

**Appendix 2 (continued).** Results of multivariable logistic regression exploring odds of practice intentions (OR, 95% CI)

|                                                                       | Long-term care facilities | Marginalized, disadvantaged and vulnerable | Rural populations        | Elderly populations       | First Nations             |
|-----------------------------------------------------------------------|---------------------------|--------------------------------------------|--------------------------|---------------------------|---------------------------|
| <b>Region of residency</b> (reference is Ontario)                     |                           |                                            |                          |                           |                           |
| Western Canada                                                        | <b>2.61 (2.00, 3.41)</b>  | <b>4.22 (3.21, 5.55)</b>                   | <b>1.57 (1.21, 2.03)</b> | 1.15 (0.72, 1.83)         | <b>9.05 (6.62, 12.38)</b> |
| Atlantic Canada                                                       | 1.49 (0.86, 2.57)         | <b>2.99 (1.69, 5.28)</b>                   | <b>2.21 (1.23, 3.97)</b> | 1.07 (0.37, 3.06)         | 1.61 (0.89, 2.93)         |
| Quebec                                                                | <b>1.47 (1.07, 2.02)</b>  | <b>2.06 (1.50, 2.83)</b>                   | <b>1.64 (1.20, 2.23)</b> | 1.02 (0.58, 1.80)         | <b>2.42 (1.69, 3.45)</b>  |
| <b>Physician characteristics</b>                                      |                           |                                            |                          |                           |                           |
| Female (reference is male)                                            | 0.93 (0.75, 1.16)         | 1.16 (0.92, 1.45)                          | <b>0.82 (0.66, 1.02)</b> | 1.33 (0.91, 1.96)         | 0.98 (0.77, 1.25)         |
| Missing/prefer not to say                                             | 1.05 (0.49, 2.26)         | 1.20 (0.52, 2.75)                          | 0.86 (0.39, 1.88)        | 0.66 (0.23, 1.94)         | 1.17 (0.50, 2.76)         |
| IMG (reference is graduate of Canadian school)                        | <b>1.38 (1.00, 1.91)</b>  | 1.02 (0.72, 1.45)                          | 1.16 (0.82, 1.62)        | 1.57 (0.81, 3.04)         | <b>0.70 (0.49, 1.00)</b>  |
| Missing/prefer not to say                                             | <b>2.66 (1.51, 4.68)</b>  | 0.62 (0.31, 1.24)                          | <b>0.32 (0.16, 0.63)</b> | <b>0.09 (0.05, 0.17)</b>  | <b>5.64 (3.06, 10.39)</b> |
| Age (reference is age <30)                                            |                           |                                            |                          |                           |                           |
| 30-34                                                                 | 0.87 (0.67, 1.12)         | 1.14 (0.88, 1.49)                          | 1.37 (1.06, 1.77)        | 0.83 (0.53, 1.31)         | 0.99 (0.75, 1.31)         |
| 35+                                                                   | 1.14 (0.81, 1.61)         | 1.00 (0.69, 1.43)                          | 1.13 (0.80, 1.60)        | 0.53 (0.30, 0.94)         | 1.00 (0.68, 1.47)         |
| Missing/prefer not to say                                             | 0.37 (0.07, 1.85)         | 1.27 (0.31, 5.12)                          | 0.67 (0.17, 2.58)        | <b>0.12 (0.03, 0.50)</b>  | 1.42 (0.33, 6.05)         |
| Childhood environment (reference is inner city/urban/suburban)        |                           |                                            |                          |                           |                           |
| Small town                                                            | 1.08 (0.81, 1.44)         | 0.77 (0.57, 1.03)                          | <b>2.17 (1.63, 2.89)</b> | 1.03 (0.59, 1.79)         | 0.92 (0.67, 1.27)         |
| Rural/remote/isolated                                                 | 1.20 (0.88, 1.64)         | 0.84 (0.60, 1.16)                          | 5.00 (3.50, 7.15)        | 0.70 (0.39, 1.27)         | 1.18 (0.83, 1.68)         |
| Mixed                                                                 | 0.87 (0.55, 1.36)         | <b>0.60 (0.38, 0.97)</b>                   | <b>1.59 (1.02, 2.48)</b> | 0.57 (0.29, 1.14)         | 1.21 (0.73, 2.01)         |
| Missing/prefer not to say                                             | 0.74 (0.20, 2.70)         | 0.84 (0.24, 2.97)                          | 0.95 (0.29, 3.18)        | 2.34 (0.20, 27.92)        | 1.44 (0.38, 5.53)         |
| <b>Intention for rural practice</b>                                   |                           |                                            |                          |                           |                           |
| Rural practice somewhat/highly likely (reference is neutral/unlikely) | <b>2.12 (1.70, 2.65)</b>  | <b>3.27 (2.60, 4.12)</b>                   | N/A                      | <b>3.90 (2.55, 5.97)</b>  | <b>4.88 (3.78, 6.31)</b>  |
| Missing/prefer not to say                                             | <b>0.27 (0.20, 0.36)</b>  | 1.69 (0.38, 7.42)                          |                          | <b>6.66 (4.20, 10.56)</b> | 1.11 (0.23, 5.29)         |

**Note:** Estimates significant at  $p \leq 0.05$  are indicated in bold. Estimates for category capturing missing responses/"prefer not to answer" not shown.
