# Supplementary material
Source: PubMed Central journal article supplement (PMC6397032)
Supplement: supp_7.1.E124_2018-0152-original-submission.pdf [file supp_7.1.E124_2018-0152-original-submission.pdf]

## Regional differences in where and how family medicine residents intend to practice

### Authors:

M. Ruth Lavergne, PhD, Faculty of Health Sciences, Simon Fraser University

Ian Scott, MSc MD, Department of Family Practice, Faculty of Medicine, University of British Columbia

Goldis Mitra, MD, Department of Family Practice, Faculty of Medicine, University of British Columbia

David Snadden, MCISc MD, Rural Doctors' UBC Chair in Rural Health, Department of Family Practice, Faculty of Medicine, University of British Columbia

Doug Blackie, MPA, School of Leadership Studies, Royal Roads University

David Rudoler, PhD, University of Ontario Institute of Technology

Laurie J. Goldsmith, PhD, Faculty of Health Sciences, Simon Fraser University

Lindsay Hedden, PhD, School of Population and Public Health, University of British Columbia

Agnes Grudniewicz, PhD, Telfer School of Management, University of Ottawa

Megan A. Ahuja, MPH, Centre for Health Services and Policy Research, School of Population and Public Health, University of British Columbia

Emily Gard Marshall, PhD, Department of Family Medicine, Faculty of Medicine, Dalhousie University

**Corresponding author:** Ruth Lavergne (ruth\_lavergne@sfu.ca)

**Funding statement:** This study was supported by CIHR project grant number 155965

**Declaration of author(s) competing interests:** The authors have no competing interests to declare.

**Word count:** 2,462

**Acknowledgements:** The authors would like to acknowledge the College of Family Physicians of Canada and the 17 university-based family medicine residency programs who have partnered to evaluate the Triple C Competency Based Curriculum which provided the survey data used in this publication. The views and opinions in this paper do not necessarily reflect the views of the CFPC or the Universities.

## Abstract

**Background:** Family medicine residents (FMRs) choose among a range of options as they enter the workforce. Their choices have implications for the supply of comprehensive primary care services. We describe practice intentions among FMRs across Canada and consider how differences in the organization of primary care may shape regional variation in practice intentions.

**Methods:** We analyzed national survey data collected by the College of Family Physicians of Canada and 17 university-based family medicine residency programs. We describe intentions for comprehensive practice, practice type, clinical domains, settings, and populations at completion of training, as well as demographic and personal characteristics of FMRs in Atlantic Canada, Quebec, Ontario, and Western Canada. We used logistic regression to estimate odds of practice intentions across regions, adjusting for FMR characteristics.

**Results:** Among 1,680 respondents, two thirds reported it is somewhat or highly likely they will provide comprehensive care to the same group of patients within the first three years of practice, but this varied from 40.3% in Atlantic Canada to 85.1% in Ontario. Most respondents reported it is somewhat or highly likely that they will seek group physician practices (93.8%) and interprofessional team-based practice (88.1%), compared to only 7.7% for solo practice.

**Interpretation:** We observe substantial regional variation in intentions for comprehensive primary care. Workforce projections may overestimate the supply of physicians entering practice who will deliver comprehensive care. There appears to be misalignment between available practice opportunities and the intentions of most FMRs to practice in a team-based environment.

## Introduction

Challenges accessing primary care persist across Canada despite historically high ratios of primary care providers per capita. Currently 15% of Canadians do not have a regular care provider (1) and only 43% are able to get same- or next-day appointments to see a doctor or nurse (2). Changes in primary care physician activity levels (3) and the types of services delivered (4,5) may help explain the gap between patient access and per-capita physician supply.

Upon completion of training, family physicians may pursue a variety of clinical practice areas, and their choices may shape the supply of primary care services available to patients. Family physicians may choose comprehensive (generalist) practice or one focused on a particular clinical area (e.g. emergency medicine, palliative care, sports medicine, or addictions). They may choose among patient populations and among practice settings, including office-based practice, hospital-based practice, work in long-term care facilities, or providing care through home visits. Family physicians may also choose among practice types, including solo practice, group physician practice, and inter-professional team-based care.

The organization and delivery of primary care and associated options for practice vary markedly among regions in Canada (6–8). For instance, in Ontario more than three-quarters of family physicians work in a model of group physician or interdisciplinary team-based practice, paid through blended salary or capitation (9). In Quebec, more than half of family physicians work in Family Medicine Groups that include multiple physicians and integration of nurses and other care providers (10). Most Albertans receive services from Primary Care Networks which can include nurses, dieticians, pharmacists, as well as physicians, though the structure varies (11). Elsewhere in Western and Atlantic Canada, supports for inter-professional practice are

1  
2  
3 developing but have been more limited in scope (6–8). Research suggests that these options,  
4 along with payment models, have differing effects on physician behaviour (12–15) and may  
5 shape practice intentions among family medicine residents (FMRs).  
6  
7  
8

9  
10 While some research examines choice of family medicine as a specialty among medical  
11 students (16–19), we have only limited information about practice intentions of Canadian FMRs  
12 from a subset of training programs (20,21). We use national survey data to describe the practice  
13 intentions of FMRs with respect to practice comprehensiveness, clinical domain, setting, and  
14 population. We also examine differences in demographic and personal characteristics of FMRs  
15 between Ontario, Quebec, Western Canada, and Atlantic Canada, and explore the degree to  
16 which these characteristics shape regional differences in practice intentions.  
17  
18  
19  
20  
21  
22  
23  
24  
25  
26  
27

## 28 **Methods**

### 29 *Data*

30  
31  
32  
33 We analyzed data from the Family Medicine Longitudinal Survey collected by the  
34 College of Family Physicians of Canada from all 17 university-based family medicine residency  
35 programs in 2016 and 2017. Surveys were sent to all FMRs in Canada within 3 months of  
36 program completion. Our analysis focused on responses to questions about practice intentions  
37 with respect to comprehensiveness, type, clinical domains, settings, and populations (see full  
38 questions in Appendix 1). The survey measured intentions for practice on a five-point scale. We  
39 dichotomized responses by grouping those selecting “somewhat likely” or “highly likely” and  
40 those selecting “neutral,” “somewhat unlikely,” or “highly unlikely.”  
41  
42  
43  
44  
45  
46  
47  
48  
49  
50  
51  
52  
53  
54  
55  
56  
57  
58  
59  
60

## *Analysis*

We summarized the demographic and personal characteristics of respondents overall and in each region as well as the number and percent of respondents selecting “somewhat likely” or “highly likely” for all survey questions capturing practice intentions. We investigated differences among regions using chi-square tests. To explore how survey respondents differ from all FMRs we compared respondent characteristics with publicly available data from the Canadian Post-MD Education Registry (CAPER) (22).

We used logistic regression to examine the relationship between region and each dichotomized practice intention variable. We used multivariable models including sex/gender,<sup>1</sup> location of medical training (Canadian or international medical graduates (IMGs)), age, and childhood geographic environment to estimate adjusted odds ratios. We excluded the number of years in service since it was collinear with age. We also included a variable that captured whether FMRs intended to work in an urban or rural environment as intentions for specific clinical domains, settings, and populations may be closely connected to whether FMRs anticipate practicing in rural or urban environment and intentions for rural practice differed markedly among regions. Respondents missing data for variables other than the outcome of interest were retained with indicator variables for “missing/prefer not to answer.” We excluded respondents with missing data for practice outcomes from each model. In describing results of logistic regression, we report “odds of intentions for” each practice outcome, as shorthand for odds of selecting “somewhat likely” or “highly likely” vs. selecting “neutral,” “somewhat unlikely,” or

---

<sup>1</sup> The survey question wording specifies “sex.” While it is plausible that biological differences specific to pregnancy and childbirth may shape intentions to some degree, it is likely socially-constructed gender roles that play a larger role. It is not possible to distinguish between sex and gender effects in this analysis, so we use the term sex/gender

1  
2  
3 “highly unlikely.” We conducted sensitivity analysis to confirm that grouping “neutral” with  
4  
5 “somewhat likely” or “highly likely” resulted in similar patterns across regions.  
6

7  
8 Ethics approval for secondary analysis of the FMLS survey data was obtained from the  
9  
10 Simon Fraser University Research Ethics Board.  
11  
12  
13

## 14 **Results**

15  
16  
17  
18  
19 Across Canada, 1,680 FMRs completed the survey with response rates of 60.1% (n=785)  
20  
21 in 2016 and 62.8% (n=895) in 2017. For respondents exiting residency in 2017, the average age  
22  
23 was 30.5 years, 61.0% were female, and 14.6% were IMGs. These percentages are comparable to  
24  
25 the 1,438 family medicine trainees exiting residency in 2017 captured in CAPER data [22] where  
26  
27 the average age was 30.1 years, 62.1% were female, and 15.5% were IMGs.  
28  
29

30  
31 We observed statistically significant differences among regions with respect to  
32  
33 sex/gender, training location, age, years since MD, and childhood environment (Table 1). 62.4%  
34  
35 of respondents were female, varying from 54.7% in Western Canada to 68.1% in Ontario. The  
36  
37 percentage of IMGs varied from 4.8% in Ontario to 21.1% in Western Canada. Ontario  
38  
39 respondents were younger and had more recently completed their MDs. Quebec had the highest  
40  
41 percentage of respondents reporting that they grew up in an inner city, urban, or suburban  
42  
43 environment (71.7%), and Atlantic Canada the lowest (47.6%).  
44  
45

46  
47 Across Canada, two-thirds of FMRs report it is somewhat or highly likely they will  
48  
49 commit to providing comprehensive care to the same group of patients in their first three years of  
50  
51 practice. This varied from 40.3% in Atlantic Canada to 85.1% in Ontario (Table 2). Across  
52  
53 Canada, over 90% of respondents reported they are confident in their ability to provide  
54  
55  
56  
57  
58  
59  
60

1  
2  
3 comprehensive care to the same group of patients over time; this was slightly lower in Atlantic  
4 Canada (82.1%). In multivariable models, significant differences in intentions to provide  
5 comprehensive care persist, but regional differences in confidence are not significant (Table 3).  
6  
7

8  
9  
10 Intentions for practice types differ substantially among regions. A higher percentage of  
11 respondents in Quebec and Western Canada indicate intentions for care in one clinical setting  
12 (Table 2) an effect which persisted in multivariable analysis (Table 3). A higher percentage of  
13 respondents in Atlantic Canada anticipate providing care across multiple clinical settings (Table  
14 2) but this effect was attenuated in multivariable analysis (Table 3).  
15  
16  
17  
18  
19  
20

21  
22 Two thirds of respondents indicate intentions for comprehensive practice that includes  
23 special interest (Table 2) with no significant variation among regions (Table 3). Almost a third of  
24 respondents (31.5%) indicate that practice focused on specific clinical areas is somewhat or  
25 highly likely (Table 2) and odds are highest in Ontario (Table 3).  
26  
27  
28  
29

30  
31 Few respondents (7.7%) indicated it is somewhat or highly likely they will work in a solo  
32 practice, compared to 93.8% in group physician practice, and 88.1% with interprofessional teams  
33 (Table 2). Odds of intentions for solo practice are higher for all regions relative to Ontario, and  
34 odds of group physician and working in interprofessional teams are lower (Table 3). Intentions  
35 for practice that includes teaching health professional learners are lowest in Ontario (66.9%) and  
36 highest in Western Canada (86.8%) (Table 2). In multivariable analysis, there are significantly  
37 higher odds of pursuing a practice that includes teaching in all regions relative to Ontario (Table  
38 3)  
39  
40  
41  
42  
43  
44  
45  
46  
47  
48

49 While we did not detect significant variation by region in intentions in some clinical  
50 domains (chronic disease and management mental health care; Table 3), variation existed in  
51 intentions for other clinical domains. Respondents in Ontario were less likely to report intentions  
52  
53  
54  
55  
56  
57  
58  
59  
60

1  
2  
3 for intrapartum care, palliative care, care in the home, and long-term care facilities (Tables 2 and  
4  
5 3). With respect to intentions for practice settings, nationally 42.0% report intentions to provide  
6  
7 care in the home and 41.0% in long-term care facilities, with Ontario having the lowest odds  
8  
9 (Tables 2 and 3). Odds of intentions for practice serving marginalized populations and First  
10  
11 Nations, Inuit and Métis peoples were lowest for Ontario and highest for Western Canada.  
12  
13

14  
15 Sensitivity analyses confirmed that our results did not change given different analytic  
16  
17 decisions. Grouping “neutral” with “somewhat unlikely” and “highly unlikely” vs. “somewhat  
18  
19 likely” and “highly likely,” including years since MD instead of age, and excluding intentions for  
20  
21 rural practice resulted in only very small changes in parameter estimates for regions.  
22  
23 Respondents did not appear to be constrained in their ratings: mean ratings varied from a  
24  
25 minimum of 1.6/5 for solo practice to a maximum of 4.7/5 for group physician practice.  
26  
27  
28  
29  
30

### 31 **Interpretation**

32  
33 Intentions to provide comprehensive care differ markedly across regions. They do not  
34  
35 appear to correspond to FMRs’ confidence in their clinical ability (Table 2), nor are differences  
36  
37 eliminated when adjusting for demographic variables or intentions for rural practice (Table 3).  
38  
39 Intentions to provide comprehensive care to the same group of patients within the first three  
40  
41 years of practice are highest in Ontario, along with intentions to practice in a group and/or  
42  
43 interprofessional team. Importantly, we found that intentions for interprofessional, team-based  
44  
45 care are very high across all regions, with more than 80% of family medicine residents across the  
46  
47 country stating intention to practice in such models. This does not correspond to current  
48  
49 availability of these models (8). In Ontario the number of primary care physicians working in  
50  
51  
52  
53  
54  
55  
56  
57  
58  
59  
60

1  
2  
3 interprofessional teams has increased dramatically (23), but is still a fraction of the total  
4  
5 workforce. Elsewhere in Canada the proportion is much lower (8).  
6

7  
8 Team-based care is a focus of medical training at all Canadian medical schools (24),  
9  
10 pointing to a lag between advances in training and changes in primary care organization and  
11  
12 delivery. The impacts of misalignment between aspirational practice intentions of graduating  
13  
14 family physicians and actual opportunities for team-based practice are not known. It is possible  
15  
16 such misalignments lead early-career physicians to exit comprehensive primary care and make  
17  
18 other practice choices (e.g., serial locum practice, walk-in clinic work, hospital-based care). This  
19  
20 is consistent with the observation that regions with lower intentions for group physician and  
21  
22 team-based practice also had lower intentions for providing comprehensive care.  
23  
24

25  
26 Even among those early-career physicians who intend to provide comprehensive care,  
27  
28 there are differences by region. In Atlantic Canada, a higher proportion of respondents intend to  
29  
30 provide care across multiple clinical settings and to rural populations. In Ontario, FMRs are more  
31  
32 likely to report intentions for comprehensive care overall, but less likely to report intentions in  
33  
34 specific clinical domains, settings, and populations. This may reflect widespread access to  
35  
36 specialized resources in Ontario, combined with team structures that do not require individual  
37  
38 physicians to provide the full range of services. Paradoxically, Ontario FMRs are also more  
39  
40 likely to report intentions for focused practice and comprehensive care. It is possible that this  
41  
42 reflects differences in primary care organization, with larger group physician and  
43  
44 interprofessional team-based practices providing coverage for patients and allowing physicians  
45  
46 to devote time to focused practice. Of course, intentions are not mutually exclusive as physicians  
47  
48 may practice in different ways as opportunities allow and as their career evolves, and FMRs may  
49  
50 not yet be certain of when and how they will combine types of practice.  
51  
52  
53  
54  
55  
56  
57  
58  
59  
60

1  
2  
3 Our results offer information that may shape service planning. In particular, we find that  
4 one third of FMRs do not anticipate providing comprehensive primary care when they enter  
5 practice, and two thirds anticipate practice that includes a special interest (Table 2). This  
6  
7 underscores the fact that workforce estimates based on headcounts may overestimate supply of  
8 physicians delivering comprehensive care (3). Further, only a minority of physicians intend to  
9  
10 provide care in the home and in long-term care facilities. This finding is consistent with  
11  
12 information on practicing physicians (5,25,26), but may be at odds with the primary care needs  
13  
14 of an aging population. Another key finding is that only 52.8% of physicians intend to provide  
15  
16 care to marginalized, disadvantaged and vulnerable populations, and 41.9% to First Nations,  
17  
18 Inuit, and Métis peoples. This may reflect differences in the patient populations across regions,  
19  
20 but may also signal gaps in recruitment and training.  
21  
22  
23  
24  
25  
26  
27

28 Although response rates to this survey were high compared with other physician surveys  
29  
30 (27,28) and demographic characteristics appear similar to CAPER data, it is plausible that  
31  
32 respondents and non-respondents differ with respect to practice intentions. It is also possible that  
33  
34 perceived desirability of comprehensive family practice may have biased respondents and led to  
35  
36 over-reporting of intentions for comprehensive practice. In addition, no definitions of terms like  
37  
38 “comprehensive care” were provided in the survey, and respondents may have interpreted terms  
39  
40 differently across regions. “Comprehensive care in one clinical setting” may have included walk-  
41  
42 in style practice for some respondents, for instance, as the survey did not include questions  
43  
44 specific to walk-in practice.  
45  
46  
47  
48

49 We examined only personal characteristics and region, not the content of training  
50  
51 programs. We can only observe location of training, not region of subsequent practice, and so  
52  
53 could not observe practice intentions among FMRs likely to practice in the Territories or in  
54  
55  
56  
57  
58  
59  
60

1  
2  
3 provinces other than where they trained. We have no information about how payment models  
4  
5 shape practice intentions from this survey, yet there is evidence that payment models may shape  
6  
7 practice choice (12–15), and evidence that early career primary care physicians may prefer non  
8  
9 fee-for-service models of compensation (29). Finally, it is unknown whether our study’s findings  
10  
11 are unique to the current cohort of FMRs, or reflect changing practice intentions, and potentially  
12  
13 changing of actual practice, among physicians of all ages.  
14  
15

16  
17 We found that one third of FMRs do not anticipate providing comprehensive care to the  
18  
19 same group of patients when they start practice, and that two thirds intend to include a special  
20  
21 interest in their practice. These findings suggest that we may be overestimating the expected  
22  
23 future supply of physicians delivering comprehensive primary care despite growing per-capita  
24  
25 supply of primary care physicians. Across the country, there appears to be misalignment between  
26  
27 available practice opportunities and the intentions of most early career family physicians to  
28  
29 practice in a team-based care environment. Further research is needed to determine whether  
30  
31 practice intentions predict future practice and to better understand what additional factors shape  
32  
33 the choices family physicians make as they navigate the early stages of their careers.  
34  
35  
36  
37  
38  
39  
40  
41  
42  
43  
44  
45  
46  
47  
48  
49  
50  
51  
52  
53  
54  
55  
56  
57  
58  
59  
60

**Table 1.** Characteristics of family medicine residents exiting programs in 2016 and 2017, by region (n, %)

|                                | Total<br>(N=1,680) | Ontario<br>(N=561) | Western<br>Canada<br>(N=663) | Atlantic<br>Canada<br>(N=68) | Quebec<br>(N=388) |                             |
|--------------------------------|--------------------|--------------------|------------------------------|------------------------------|-------------------|-----------------------------|
|                                | n (%)              | n (%)              | n (%)                        | n (%)                        | n (%)             | p-value (chi <sup>2</sup> ) |
| <b>Sex/gender</b>              |                    |                    |                              |                              |                   | <0.001                      |
| Male                           | 619 (37.6)         | 177 (31.9)         | 291 (45.3)                   | 23 (35.4)                    | 128 (33.7)        |                             |
| Female                         | 1027 (62.4)        | 378 (68.1)         | 355 (54.7)                   | 42 (64.6)                    | 252 (66.3)        |                             |
| <b>Location of MD training</b> |                    |                    |                              |                              |                   | <0.001                      |
| Canada                         | 1386 (85.6)        | 477 (95.2)         | 523 (78.9)                   | 59 (86.8)                    | 327 (84.5)        |                             |
| International                  | 233 (14.4)         | 24 (4.8)           | 140 (21.1)                   | 9 (13.2)                     | 60 (15.5)         |                             |
| <b>Age groupings (years)</b>   |                    |                    |                              |                              |                   | <0.001                      |
| <30                            | 931 (58.6)         | 410 (73.3)         | 318 (48.3)                   | 28 (42.4)                    | 175 (57)          |                             |
| 30-34                          | 433 (27.2)         | 80 (14.3)          | 222 (33.7)                   | 24 (36.4)                    | 107 (34.9)        |                             |
| 35+                            | 226 (14.2)         | 69 (12.3)          | 118 (17.9)                   | 14 (21.2)                    | 25 (8.1)          |                             |
| <b>Years since MD</b>          |                    |                    |                              |                              |                   | <0.001                      |
| 2                              | 1325 (79.1)        | 470 (83.8)         | 489 (74.0)                   | 56 (82.4)                    | 310 (80.3)        |                             |
| 3                              | 145 (8.7)          | 28 (5.0)           | 67 (10.1)                    | 8 (11.8)                     | 42 (10.9)         |                             |
| 4+                             | 206 (12.3)         | 63 (11.2)          | 105 (15.9)                   | 4 (5.9)                      | 34 (8.8)          |                             |
| <b>Childhood environment</b>   |                    |                    |                              |                              |                   | <0.001                      |
| Inner city/<br>Urban/Suburban  | 1051 (63.0)        | 317 (56.5)         | 428 (64.9)                   | 30 (47.6)                    | 276 (71.7)        |                             |
| Small town                     | 280 (16.8)         | 107 (19.1)         | 93 (14.1)                    | 15 (23.8)                    | 65 (16.9)         |                             |
| Rural/remote/isolated          | 234 (14.0)         | 92 (16.4)          | 96 (14.6)                    | 15 (23.8)                    | 31 (8.1)          |                             |
| Mixed                          | 103 (6.2)          | 45 (8.0)           | 42 (6.4)                     | 3 (4.8)                      | 13 (3.4)          |                             |

**Note:** 34 residents offered no response/preferred not to answer for sex/gender, 61 for place of MD, 90 for age, 4 for years since MD, and 12 for childhood environment.

**Table 2.** Practice intentions among family medicine residents exiting residencies in 2016 and 2017, by region (n, %.)

|                                                                                                                                                            | Total        | Ontario    | Western<br>Canada | Atlantic<br>Canada | Quebec     | p-value<br>(chi <sup>2</sup> ) |
|------------------------------------------------------------------------------------------------------------------------------------------------------------|--------------|------------|-------------------|--------------------|------------|--------------------------------|
| <b>Residents reporting that they are somewhat or highly likely they</b>                                                                                    |              |            |                   |                    |            |                                |
| Will commit to providing comprehensive care to the same group of patients in first three years of practice (Q17, N=1,652)                                  | 1,095 (66.3) | 474 (85.1) | 401 (61.2)        | 27 (40.3)          | 193 (51.7) | <0.001                         |
| Agree with the statement: "I am confident in my current ability to provide comprehensive care to the same group of patients over time." (Q19, N=1,658)     | 1,529 (92.2) | 509 (91.2) | 609 (93.4)        | 55 (82.1)          | 356 (93.4) | 0.006                          |
| <b>Residents reporting that after completing residency, it is somewhat or highly likely they will practice in the following practice types</b>             |              |            |                   |                    |            |                                |
| Comprehensive care delivered in one clinical setting (e.g. office-based) (Q16a, N=1,659)                                                                   | 1,019 (61.4) | 320 (57.5) | 416 (63.7)        | 32 (47.8)          | 251 (65.7) | 0.004                          |
| Comprehensive care provided across multiple clinical settings (e.g. in-hospital, long-term care, office) (Q16b, 1,661)                                     | 1,261 (75.9) | 437 (78.0) | 504 (77.2)        | 56 (83.6)          | 264 (69.3) | 0.004                          |
| Comprehensive care that includes a special interest (e.g. sports medicine, emergency medicine, palliative care, etc.) (Q16c, N=1,661)                      | 1,122 (67.6) | 372 (66.6) | 451 (69.1)        | 49 (73.1)          | 250 (65.5) | 0.446                          |
| Practice focused on specific clinical areas (e.g. sports medicine, maternity care, emergency medicine, palliative care, hospital medicine) (Q16d, N=1,658) | 522 (31.5)   | 225 (40.3) | 179 (27.5)        | 18 (26.9)          | 100 (26.3) | <0.001                         |
| Solo practice (Q15a, N=1,645)                                                                                                                              | 126 (7.7)    | 25 (4.6)   | 59 (9.1)          | 8 (12.1)           | 34 (9.0)   | 0.007                          |
| Group physician practice (Q15b, N=1,658)                                                                                                                   | 1,556 (93.8) | 536 (96.2) | 615 (94.0)        | 60 (90.9)          | 345 (90.6) | 0.003                          |
| Interprofessional team-based practice (Q15c, N=1,656)                                                                                                      | 1,459 (88.1) | 520 (93.7) | 561 (85.9)        | 59 (89.4)          | 319 (83.5) | <0.001                         |
| Practice that includes teaching health profession learners (Q15d, N=1,652)                                                                                 | 1,293 (78.3) | 370 (66.9) | 566 (86.8)        | 53 (79.1)          | 304 (80.0) | <0.001                         |
| <b>Residents reporting it is somewhat or highly likely they will provide care in the following clinical domains in the first 3 years</b>                   |              |            |                   |                    |            |                                |
| Care across the life cycle (Q21a, N=1,658)                                                                                                                 | 1,506 (90.8) | 515 (92.1) | 594 (91.0)        | 56 (83.6)          | 341 (90.0) | 0.127                          |
| Intrapartum care (Q21b, N=1,654)                                                                                                                           | 623 (37.7)   | 174 (31.2) | 276 (42.5)        | 28 (41.8)          | 145 (38.3) | 0.001                          |
| Mental health care (Q21c, N=1,654)                                                                                                                         | 1,467 (88.7) | 484 (86.7) | 587 (90.3)        | 60 (89.6)          | 336 (88.7) | 0.276                          |
| Chronic disease management (Q21d, N=1,650)                                                                                                                 | 1,541 (93.4) | 513 (92.1) | 618 (94.8)        | 59 (90.8)          | 351 (93.4) | 0.232                          |
| Palliative care/end of life care (Q21e, N=1,653)                                                                                                           | 1,060 (64.1) | 276 (49.6) | 483 (74.1)        | 48 (72.7)          | 253 (66.8) | <0.001                         |
| Office-based clinical procedures (Q21f, N=1,649)                                                                                                           | 1,382 (83.8) | 435 (78.4) | 585 (90.0)        | 52 (78.8)          | 310 (82.0) | <0.001                         |
| In-hospital clinical procedures (e.g. chest tube insertion, adult lumbar puncture, nasogastric tube insertion) (Q21g, N=1,655)                             | 646 (39.0)   | 193 (34.6) | 296 (45.5)        | 24 (35.8)          | 133 (35.1) | <0.001                         |
| <b>Residents reporting it is somewhat or highly likely they will provide care in the following practice settings/populations in the first 3 years</b>      |              |            |                   |                    |            |                                |
| Emergency departments (Q21h, N=1,656)                                                                                                                      | 693 (41.8)   | 194 (34.8) | 324 (49.7)        | 32 (47.8)          | 143 (37.7) | <0.001                         |
| In-hospital (Q21i, 1,653)                                                                                                                                  | 983 (59.5)   | 315 (56.7) | 430 (66.0)        | 49 (74.2)          | 189 (49.9) | <0.001                         |
| Care in the home (Q21j, N=1,654)                                                                                                                           | 695 (42.0)   | 176 (31.6) | 298 (45.8)        | 35 (52.2)          | 186 (49.1) | <0.001                         |
| Long-term care facilities (Q21k, N=1,655)                                                                                                                  | 678 (41.0)   | 169 (30.3) | 344 (52.8)        | 27 (40.3)          | 138 (36.4) | <0.001                         |
| Marginalized, disadvantaged and vulnerable populations (Q21l, N=1,652)                                                                                     | 873 (52.8)   | 177 (31.9) | 449 (69.0)        | 43 (64.2)          | 204 (53.8) | <0.001                         |
| Rural populations (Q21m, N=1,577)                                                                                                                          | 852 (54.0)   | 252 (45.2) | 383 (58.7)        | 46 (68.7)          | 171 (57.2) | <0.001                         |
| Elderly populations (Q21n, N=1,576)                                                                                                                        | 1,425 (90.4) | 480 (86.0) | 607 (93.0)        | 62 (92.5)          | 276 (92.6) | <0.001                         |
| First Nations, Inuit and Métis (Q21o, N=1,656)                                                                                                             | 694 (41.9)   | 121 (21.7) | 422 (64.6)        | 22 (32.8)          | 129 (34.0) | <0.001                         |

**Table 3.** Results of logistic regression exploring odds of practice intentions (OR, 95% CI)\*

| FMLS question (Question number, response count)                                                                                                            | Region   | Unadjusted OR            | Adjusted OR**            |
|------------------------------------------------------------------------------------------------------------------------------------------------------------|----------|--------------------------|--------------------------|
| Reference is Ontario                                                                                                                                       |          |                          |                          |
| <b>Residents reporting that they are somewhat or highly likely they</b>                                                                                    |          |                          |                          |
| Will commit to providing comprehensive care to the same group of patients in first three years of practice (Q17, N=1,652)                                  | Western  | <b>0.28 (0.21, 0.37)</b> | <b>0.18 (0.13, 0.25)</b> |
|                                                                                                                                                            | Atlantic | <b>0.12 (0.07, 0.20)</b> | <b>0.07 (0.04, 0.12)</b> |
|                                                                                                                                                            | Quebec   | <b>0.19 (0.14, 0.26)</b> | <b>0.14 (0.10, 0.20)</b> |
| Agree with the statement: "I am confident in my current ability to provide comprehensive care to the same group of patients over time." (Q19, N=1,658)     | Western  | 1.36 (0.89, 2.09)        | 1.53 (0.95, 2.45)        |
|                                                                                                                                                            | Atlantic | 0.44 (0.22, 0.88)        | 0.50 (0.24, 1.05)        |
|                                                                                                                                                            | Quebec   | 1.37 (0.83, 2.26)        | 1.55 (0.86, 2.79)        |
| <b>Residents reporting that after completing residency, it is somewhat or highly likely they will practice in the following practice types</b>             |          |                          |                          |
| Comprehensive care delivered in one clinical setting (e.g. office-based) (Q16a, N=1,659)                                                                   | Western  | <b>1.30 (1.03, 1.64)</b> | <b>1.32 (1.02, 1.72)</b> |
|                                                                                                                                                            | Atlantic | 0.68 (0.41, 1.13)        | 0.74 (0.43, 1.27)        |
|                                                                                                                                                            | Quebec   | <b>1.42 (1.08, 1.86)</b> | <b>1.37 (1.00, 1.87)</b> |
| Comprehensive care provided across multiple clinical settings (e.g. in-hospital, long-term care, office) (Q16b, 1,661)                                     | Western  | 0.95 (0.73, 1.25)        | 0.83 (0.61, 1.13)        |
|                                                                                                                                                            | Atlantic | 1.43 (0.73, 2.82)        | 1.05 (0.51, 2.19)        |
|                                                                                                                                                            | Quebec   | <b>0.64 (0.47, 0.85)</b> | <b>0.60 (0.42, 0.85)</b> |
| Comprehensive care that includes a special interest (e.g. sports medicine, emergency medicine, palliative care, etc.) (Q16c, N=1,661)                      | Western  | 1.12 (0.88, 1.43)        | 1.12 (0.86, 1.48)        |
|                                                                                                                                                            | Atlantic | 1.37 (0.78, 2.42)        | 1.34 (0.74, 2.43)        |
|                                                                                                                                                            | Quebec   | 0.95 (0.72, 1.25)        | 0.91 (0.66, 1.25)        |
| Practice focused on specific clinical areas (e.g. sports medicine, maternity care, emergency medicine, palliative care, hospital medicine) (Q16d, N=1,658) | Western  | <b>0.56 (0.44, 0.71)</b> | <b>0.55 (0.42, 0.72)</b> |
|                                                                                                                                                            | Atlantic | <b>0.54 (0.31, 0.96)</b> | 0.58 (0.32, 1.04)        |
|                                                                                                                                                            | Quebec   | <b>0.53 (0.40, 0.70)</b> | <b>0.48 (0.35, 0.67)</b> |
| Solo practice (Q15a, N=1,645)                                                                                                                              | Western  | <b>2.10 (1.30, 3.40)</b> | <b>2.53 (1.43, 4.48)</b> |
|                                                                                                                                                            | Atlantic | <b>2.90 (1.25, 6.72)</b> | 2.63 (0.99, 6.96)        |
|                                                                                                                                                            | Quebec   | <b>2.06 (1.21, 3.52)</b> | <b>3.09 (1.65, 5.78)</b> |
| Group physician practice (Q15b, N=1,658)                                                                                                                   | Western  | 0.62 (0.36, 1.06)        | <b>0.45 (0.23, 0.87)</b> |
|                                                                                                                                                            | Atlantic | 0.39 (0.15, 1.01)        | <b>0.30 (0.10, 0.88)</b> |
|                                                                                                                                                            | Quebec   | <b>0.38 (0.22, 0.65)</b> | <b>0.28 (0.14, 0.57)</b> |
| Interprofessional team-based practice (Q15c, N=1,656)                                                                                                      | Western  | <b>0.41 (0.27, 0.62)</b> | <b>0.35 (0.22, 0.56)</b> |
|                                                                                                                                                            | Atlantic | 0.57 (0.24, 1.33)        | 0.46 (0.18, 1.15)        |
|                                                                                                                                                            | Quebec   | <b>0.34 (0.22, 0.53)</b> | <b>0.26 (0.16, 0.44)</b> |
| Practice that includes teaching health profession learners (Q15d, N=1,652)                                                                                 | Western  | <b>3.26 (2.44, 4.34)</b> | <b>3.81 (2.76, 5.25)</b> |
|                                                                                                                                                            | Atlantic | 1.87 (1.01, 3.46)        | <b>1.93 (1.01, 3.71)</b> |
|                                                                                                                                                            | Quebec   | <b>1.98 (1.45, 2.69)</b> | <b>2.24 (1.57, 3.21)</b> |
| <b>Residents reporting it is somewhat or highly likely they will provide care in the following domains in the first 3 years</b>                            |          |                          |                          |
| Care across the life cycle (Q21a, N=1,658)                                                                                                                 | Western  | 0.86 (0.57, 1.29)        | 0.72 (0.45, 1.15)        |
|                                                                                                                                                            | Atlantic | <b>0.43 (0.21, 0.89)</b> | <b>0.31 (0.14, 0.68)</b> |
|                                                                                                                                                            | Quebec   | 0.77 (0.49, 1.21)        | 0.78 (0.44, 1.38)        |
| Intrapartum care (Q21b, N=1,654)                                                                                                                           | Western  | <b>1.63 (1.28, 2.06)</b> | <b>1.83 (1.40, 2.40)</b> |
|                                                                                                                                                            | Atlantic | 1.58 (0.94, 2.66)        | 1.48 (0.85, 2.58)        |
|                                                                                                                                                            | Quebec   | <b>1.37 (1.04, 1.80)</b> | <b>1.50 (1.09, 2.07)</b> |
| Mental health care (Q21c, N=1,654)                                                                                                                         | Western  | 1.42 (1.00, 2.04)        | 1.26 (0.84, 1.91)        |
|                                                                                                                                                            | Atlantic | 1.31 (0.58, 2.98)        | 1.13 (0.45, 2.82)        |
|                                                                                                                                                            | Quebec   | 1.19 (0.80, 1.78)        | 1.05 (0.64, 1.71)        |
| Chronic disease management (Q21d, N=1,650)                                                                                                                 | Western  | 1.56 (0.98, 2.48)        | 1.08 (0.63, 1.83)        |
|                                                                                                                                                            | Atlantic | 0.84 (0.34, 2.06)        | 0.54 (0.20, 1.45)        |
|                                                                                                                                                            | Quebec   | 1.20 (0.72, 2.00)        | 0.86 (0.46, 1.61)        |
| Palliative care/end of life care (Q21e, N=1,653)                                                                                                           | Western  | <b>2.90 (2.28, 3.69)</b> | <b>2.61 (1.99, 3.42)</b> |
|                                                                                                                                                            | Atlantic | <b>2.71 (1.54, 4.77)</b> | <b>2.32 (1.26, 4.27)</b> |
|                                                                                                                                                            | Quebec   | <b>2.04 (1.55, 2.67)</b> | <b>2.05 (1.49, 2.83)</b> |

|                                                                                                                                                       |          |                          |                           |
|-------------------------------------------------------------------------------------------------------------------------------------------------------|----------|--------------------------|---------------------------|
| Office-based clinical procedures (Q21f, N=1,649)                                                                                                      | Western  | <b>2.48 (1.79, 3.44)</b> | <b>2.22 (1.55, 3.17)</b>  |
|                                                                                                                                                       | Atlantic | 1.02 (0.55, 1.91)        | 0.82 (0.42, 1.60)         |
|                                                                                                                                                       | Quebec   | 1.26 (0.90, 1.75)        | 1.25 (0.84, 1.87)         |
| In-hospital clinical procedures (e.g. chest tube insertion, adult lumbar puncture, nasogastric tube insertion) (Q21g, N=1,655)                        | Western  | 1.58 (1.25, 1.99)        | <b>1.51 (1.14, 2.00)</b>  |
|                                                                                                                                                       | Atlantic | 1.06 (0.62, 1.79)        | 0.84 (0.47, 1.51)         |
|                                                                                                                                                       | Quebec   | 1.02 (0.78, 1.34)        | 0.96 (0.68, 1.35)         |
| <b>Residents reporting it is somewhat or highly likely they will provide care in the following practice settings/populations in the first 3 years</b> |          |                          |                           |
| Emergency departments (Q21h, N=1,656)                                                                                                                 | Western  | <b>1.85 (1.47, 2.34)</b> | <b>1.85 (1.39, 2.47)</b>  |
|                                                                                                                                                       | Atlantic | <b>1.72 (1.03, 2.86)</b> | 1.51 (0.85, 2.70)         |
|                                                                                                                                                       | Quebec   | 1.14 (0.87, 1.49)        | 1.10 (0.78, 1.55)         |
| In-hospital (Q21i, 1,653)                                                                                                                             | Western  | <b>1.48 (1.17, 1.87)</b> | 1.07 (0.82, 1.41)         |
|                                                                                                                                                       | Atlantic | <b>2.21 (1.24, 3.93)</b> | 1.37 (0.73, 2.58)         |
|                                                                                                                                                       | Quebec   | 0.76 (0.59, 0.99)        | 0.59 (0.43, 0.82)         |
| Care in the home (Q21j, N=1,654)                                                                                                                      | Western  | <b>1.83 (1.44, 2.31)</b> | <b>1.84 (1.41, 2.40)</b>  |
|                                                                                                                                                       | Atlantic | <b>2.37 (1.42, 3.95)</b> | <b>2.17 (1.26, 3.73)</b>  |
|                                                                                                                                                       | Quebec   | <b>2.09 (1.59, 2.73)</b> | <b>2.54 (1.86, 3.48)</b>  |
| Long-term care facilities (Q21k, N=1,655)                                                                                                             | Western  | <b>2.58 (2.03, 3.27)</b> | <b>2.61 (2.00, 3.41)</b>  |
|                                                                                                                                                       | Atlantic | 1.55 (0.92, 2.61)        | 1.49 (0.86, 2.57)         |
|                                                                                                                                                       | Quebec   | 1.32 (1.00, 1.74)        | <b>1.47 (1.07, 2.02)</b>  |
| Marginalized, disadvantaged and vulnerable populations (Q21l, N=1,652)                                                                                | Western  | <b>4.75 (3.72, 6.06)</b> | <b>4.22 (3.21, 5.55)</b>  |
|                                                                                                                                                       | Atlantic | <b>3.83 (2.25, 6.50)</b> | <b>2.99 (1.69, 5.28)</b>  |
|                                                                                                                                                       | Quebec   | <b>2.49 (1.90, 3.26)</b> | <b>2.06 (1.50, 2.83)</b>  |
| Elderly populations (Q21n, N=1,576)                                                                                                                   | Western  | <b>2.14 (1.46, 3.15)</b> | 1.15 (0.72, 1.83)         |
|                                                                                                                                                       | Atlantic | 2.02 (0.79, 5.17)        | 1.07 (0.37, 3.06)         |
|                                                                                                                                                       | Quebec   | <b>2.04 (1.24, 3.35)</b> | 1.02 (0.58, 1.80)         |
| First Nations, Inuit and Métis (Q21o, N=1,656)                                                                                                        | Western  | <b>6.58 (5.09, 8.52)</b> | <b>9.05 (6.62, 12.38)</b> |
|                                                                                                                                                       | Atlantic | <b>1.76 (1.02, 3.05)</b> | 1.61 (0.89, 2.93)         |
|                                                                                                                                                       | Quebec   | <b>1.86 (1.39, 2.49)</b> | <b>2.42 (1.69, 3.45)</b>  |

Note: Estimates indicated in bold are significant at  $p < 0.05$ .

\*Odds ratios reflect odds of selecting “somewhat likely” or “highly likely” divided by the odds of selecting “neutral,” “somewhat unlikely,” or “highly unlikely”

\*\*Multivariable models include resident sex/gender, IMG vs. Canadian graduate, age, childhood environment, and intention for rural practice. Full regression results are provided in Appendix 2.

## References

1. Statistics Canada. CANSIM Table 105-0501 - Health indicator profile, annual estimates by age group and sex, Canada, provinces, territories, health regions. 2008-2011 [Internet]. [cited 2016 Jan 13]. Available from: <http://www5.statcan.gc.ca/cansim/a26?lang=eng&id=1050501>
2. Canadian Institute for Health Information (CIHI). How Canada Compares: Results From The Commonwealth Fund's 2016 International Health Policy Survey of Adults in 11 Countries. Ottawa, ON: CIHI; 2017.
3. Hedden L, Barer ML, McGrail K, Law M, Bourgeault IL. In British Columbia, the supply of primary care physicians grew, but their rate of clinical activity declined. *Health Aff.* 2017;36(11):1904–11.
4. Chan BTB. The declining comprehensiveness of primary care. *CMAJ.* 2002;166(4):429–34.
5. Lavergne MR, Peterson S, McKendry R, Sivananthan S, McGrail K. Full-Service Family Practice in British Columbia: Policy Interventions and Trends in Practice, 1991-2010. *Healthc policy.* 2014 May;9(4):32–47.
6. Strumpf E, Levesque J-F, Coyle N, Hutchison B, Barnes M, Wedel RJ. Innovative and diverse strategies toward primary health care reform: lessons learned from the Canadian experience. *J Am Board Fam Med.* 2012;25 Suppl 1:S27-33.
7. Aggarwal M, Hutchison B. Toward a Primary Care Strategy for Canada. Canadian Foundation for Healthcare Improvement. 2012.
8. Peckham A, Ho J, Marchildon G. Policy Innovations in Primary Care Across Canada: a Rapid Review Prepared for the Canadian Foundation for Health Innovation. Toronto ON; 2018.
9. Hutchison B, Glazier R. Ontario's Primary Care Reforms Have Transformed The Local Care Landscape, But A Plan Is Needed For Ongoing Improvement. *Health Aff.* 2013;32(4):695–703.
10. Coyle N, Strumpf E, Fiset-Laniel J, Tousignant P, Roy Y. Characteristics of physicians and patients who join team-based primary care practices: Evidence from Quebec's Family Medicine Groups. *Health Policy.* 2014;116(2–3):264–72.
11. Hutchison B, Levesque J-F, Strumpf E, Coyle N. Primary health care in Canada: Systems in motion. *Milbank Q.* 2011;89(2):529–32.
12. McGuire T. Physician agency and payment for primary medical care. *Oxford Handb Heal Econ.* 2011;602–623.
13. Leger P. Physician Payment Mechanisms. In: *Financing Health Care.* Weinheim, Germany: Wiley-VCH Verlag GmbH & Co. KGaA; 2007. p. 149–176.
14. Gosden T, Forland F, Kristiansen I, Sutton M, Leese B, Giuffrida A, et al. Capitation, salary, fee-for-service and mixed systems of payment: effects on the behaviour of primary care physicians (Review). *Cochrane Database Syst Rev.* 2011;(3):1–25.
15. Gosden T, Forland F, Kristiansen I. Impact of payment method on behaviour of primary care physicians: a systematic review. *J Health Serv Res Policy.* 2001;6(1):44–55.
16. Kiolbassa K, Miksch A, Hermann K, Loh A, Szecsenyi J, Joos S, et al. Becoming a general practitioner--which factors have most impact on career choice of medical students? *BMC Fam Pract.* 2011;12:25.
17. Connelly MT, Sullivan AM, Peters AS, Clark-Chiarelli N, Zotov N, Martin N, et al.

- Variation in predictors of primary care career choice by year and stage of training. *J Gen Intern Med.* 2003;18(3):159–69.
18. Scott I, Wright B, Brenneis F, Brett-MacLean P, McCaffrey L. Why would I choose a career in family medicine? Reflections of medical students at 3 universities. *Can Fam Physician.* 2007;53(11).
  19. Bennett KL, Phillips JP. Finding, Recruiting, and Sustaining the Future Primary Care Physician Workforce: A New Theoretical Model of Specialty Choice Process. *Acad Med.* 2010;85(10):S81–8.
  20. Oandasan IF, Archibald D, Authier L, Lawrence K, Mcewen LA, Mackay MP, et al. Future practice of comprehensive care. *Can Fam Physician.* 2018;64:520–8.
  21. Grierson LEM, Fowler N, Kwan MYW. Family medicine residents ' practice intentions Recherche Les intentions de pratique des résidents en médecine familiale. *Can Fam Physician.* 2015;61:524–31.
  22. Walton M, Rourke J, Bowmer I, Kearney R, Buske L. 2016-2017 Annual Census of Post-M.D. Trainees. CAPER-RCEP; 2017.
  23. Hutchison B, Glazier R. Ontario's Primary Care Reforms Have Transformed The Local Care Landscape, But A Plan Is Needed For Ongoing Improvement. *Health Aff.* 2013;32(4):695–703.
  24. The Association of Faculties of Medicine of Canada. A collective vision for postgraduate medical education in Canada. 2012.
  25. Hedden L. Beyond full-time equivalents: gender differences in activity and practice patterns for BC's primary care physicians. University of British Columbia; 2015.
  26. Schultz SE, Glazier RH. Identification of physicians providing comprehensive primary care in Ontario: a retrospective analysis using linked administrative data. *CMAJ Open.* 2017;5(4):E856–63.
  27. Cunningham CT, Cai P, Topps D, Svenson LW, Jetté N, Quan H. Mining rich health data from Canadian physician claims: features and face validity. *BMC Res Notes.* 2014;7:682.
  28. Kellerman SE, Herold J. Physician response to surveys: A review of the literature. *Am J Prev Med.* 2001;20(1):61–7.
  29. Brcic V, McGregor M, Kaczorowski J. Practice and payment preferences of newly practising family physicians in British Columbia. *Can Fam Physician.* 2012;58:275–81.

**Appendix 1.** List of Family Medicine Longitudinal Survey questions describing practice intentions

15. After completing your residency, how likely are you to practice in the following organizational models?

- a. Solo practice
- b. Group physician practice
- c. Interprofessional team-based practice
- d. Practice that includes teaching health profession learners

16. After completing your residency, how likely are you to practice in the following family medicine practice types?

- e. Comprehensive care delivered in one clinical setting. (e.g., office –based)
- f. Comprehensive care provided across multiple clinical settings (in-hospital, long-term care, office).
- g. Comprehensive care that includes a special interest (such as sports medicine, emergency medicine, palliative care, etc.)
- h. I plan to focus only on specific clinical areas (such as sports medicine, maternity care, emergency medicine, palliative care, hospital medicine etc.)

17. In your first three years of practice, do you intend to commit to providing comprehensive care to the same group of patients?

18. If very unlikely or somewhat unlikely, what is your primary reason? (check one only)

19. To what extent do you agree or disagree with the following statement: “*I am confident in my current ability to provide comprehensive care to the same group of patients over time.*”

20. How much exposure have you had to the following domains, practice settings, and specific populations in your medical education to date?

- a. Care across the life cycle
- b. Intrapartum care
- c. Mental health care
- d. Chronic disease management
- e. Palliative Care/End of life
- f. Office-based clinical procedures
- g. In-hospital clinical procedures (e.g. chest tube insertion, adult lumbar puncture, nasogastric tube insertion)
- h. Practice setting – Emergency departments
- i. Practice setting – In-hospital
- j. Practice setting – Care in the home
- k. Practice setting – Long-term care facilities
- l. Marginalized, disadvantaged and vulnerable populations
- m. Rural populations
- n. Elderly populations

- 1  
2  
3 o. Aboriginal populations/First Nations, Inuit and Métis  
4

5  
6 21. In your future practice as a family physician, how likely are you to provide care in each of  
7 the following domains, practice settings, and specific populations in the first 3 years?

- 8 a. Care across the life cycle   
9 b. Intrapartum care   
10 c. Mental health care   
11 d. Chronic disease management   
12 e. Palliative Care/End of life   
13 f. Office-based clinical procedures   
14 g. In-hospital clinical procedures (e.g. chest tube insertion, adult lumbar puncture,  
15 nasogastric tube insertion)   
16 h. Practice setting – Emergency departments   
17 i. Practice setting – In-hospital   
18 j. Practice setting – Care in the home   
19 k. Practice setting – Long-term care facilities   
20 l. Marginalized, disadvantaged and vulnerable populations   
21 m. Rural populations   
22 n. Elderly populations   
23 o. Aboriginal populations/First Nations, Inuit and Métis   
24  
25  
26

27 22. To what extent do you agree or disagree with the following statement:

28 *'I am confident to begin the practice of comprehensive family medicine in any community in*  
29 *Canada.'*  
30  
31  
32  
33  
34  
35  
36  
37  
38  
39  
40  
41  
42  
43  
44  
45  
46  
47  
48  
49  
50  
51  
52  
53  
54  
55  
56  
57  
58  
59  
60

1  
2  
3  
4  
5  
6  
7  
8  
9  
10  
11  
12  
13  
14  
15  
16  
17  
18  
19  
20  
21  
22  
23  
24  
25  
26  
27  
28  
29  
30  
31  
32  
33  
34  
35  
36  
37  
38  
39  
40  
41  
42  
43  
44  
45  
46  
47

**Appendix 2. Results of multivariable logistic regression exploring odds of practice intentions (OR, 95% CI)**

|                                                                       | Intend to provide comprehensive care to the same group of patients within first 3 years | Confident in ability | Comprehensive care - one clinical setting. (e.g. office) | Comprehensive care - multiple clinical settings | Comprehensive care that includes a special interest |
|-----------------------------------------------------------------------|-----------------------------------------------------------------------------------------|----------------------|----------------------------------------------------------|-------------------------------------------------|-----------------------------------------------------|
| Western Canada                                                        | <b>0.18 (0.13, 0.25)</b>                                                                | 1.53 (0.95, 2.45)    | <b>1.32 (1.02, 1.71)</b>                                 | 0.83 (0.61, 1.13)                               | 1.13 (0.86, 1.48)                                   |
| Atlantic Canada                                                       | <b>0.07 (0.04, 0.12)</b>                                                                | 0.50 (0.24, 1.05)    | 0.74 (0.43, 1.27)                                        | 1.05 (0.50, 2.19)                               | 1.34 (0.74, 2.43)                                   |
| Quebec                                                                | <b>0.14 (0.10, 0.20)</b>                                                                | 1.55 (0.86, 2.79)    | <b>1.37 (1.00, 1.87)</b>                                 | <b>0.60 (0.42, 0.85)</b>                        | 0.91 (0.66, 1.25)                                   |
| <b>Physician characteristics</b>                                      |                                                                                         |                      |                                                          |                                                 |                                                     |
| Female (reference is male)                                            | 1.12 (0.89, 1.42)                                                                       | 1.12 (0.76, 1.65)    | <b>1.48 (1.19, 1.84)</b>                                 | 1.14 (0.89, 1.47)                               | 0.93 (0.74, 1.16)                                   |
| IMG (reference is graduate of Canadian school)                        | <b>3.26 (2.21, 4.81)</b>                                                                | 1.04 (0.59, 1.86)    | <b>1.87 (1.31, 2.67)</b>                                 | 0.85 (0.59, 1.23)                               | 1.04 (0.74, 1.45)                                   |
| Age (reference is age <30)                                            |                                                                                         |                      |                                                          |                                                 |                                                     |
| 30-34                                                                 | 1.20 (0.92, 1.56)                                                                       | 0.76 (0.48, 1.21)    | 1.00 (0.78, 1.29)                                        | 0.87 (0.65, 1.18)                               | <b>0.75 (0.58, 0.98)</b>                            |
| 35+                                                                   | <b>2.06 (1.37, 3.11)</b>                                                                | 0.54 (0.31, 0.94)    | 1.52 (1.05, 2.19)                                        | 0.75 (0.50, 1.11)                               | 0.74 (0.52, 1.06)                                   |
| Childhood environment (reference is inner city/urban/suburban)        |                                                                                         |                      |                                                          |                                                 |                                                     |
| Small town                                                            | 1.21 (0.88, 1.67)                                                                       | 1.07 (0.63, 1.81)    | <b>0.58 (0.44, 0.77)</b>                                 | 1.40 (0.97, 1.95)                               | 1.08 (0.80, 1.44)                                   |
| Rural/remote/isolated                                                 | 1.40 (0.98, 2.00)                                                                       | 0.86 (0.50, 1.46)    | <b>0.61 (0.45, 0.83)</b>                                 | <b>2.38 (1.47, 3.83)</b>                        | 1.32 (0.94, 1.85)                                   |
| Mixed                                                                 | 1.02 (0.61, 1.70)                                                                       | 1.34 (0.58, 3.05)    | 0.66 (0.42, 1.02)                                        | 0.99 (0.60, 1.61)                               | 1.06 (0.68, 1.66)                                   |
| Rural practice somewhat/highly likely (reference is neutral/unlikely) | 1.06 (0.83, 1.35)                                                                       | 1.08 (0.72, 1.60)    | <b>0.51 (0.41, 0.64)</b>                                 | <b>3.25 (2.50, 4.23)</b>                        | <b>1.74 (1.39, 2.17)</b>                            |

**Note:** Estimates significant at p<0.05 are indicated in bold. Estimates for category capturing missing responses/"prefer not to answer" not shown.

**Appendix 2 (continued).** Results of multivariable logistic regression exploring odds of practice intentions (OR, 95% CI)

|                                                                       | Focused practice         | Solo practice            | Group physician practice | Interprofessional team-based practice | Practice that includes teaching |
|-----------------------------------------------------------------------|--------------------------|--------------------------|--------------------------|---------------------------------------|---------------------------------|
| <b>Region of residency</b> (reference is Ontario)                     |                          |                          |                          |                                       |                                 |
| Western Canada                                                        | <b>0.55 (0.42, 0.72)</b> | <b>2.53 (1.43, 4.48)</b> | <b>0.45 (0.23, 0.87)</b> | <b>0.35 (0.22, 0.56)</b>              | <b>3.81 (2.77, 5.25)</b>        |
| Atlantic Canada                                                       | 0.58 (0.32, 1.04)        | 2.63 (0.99, 6.96)        | <b>0.30 (0.10, 0.88)</b> | 0.46 (0.18, 1.15)                     | <b>1.93 (1.01, 3.71)</b>        |
| Quebec                                                                | <b>0.48 (0.35, 0.67)</b> | <b>3.09 (1.65, 5.78)</b> | <b>0.28 (0.14, 0.57)</b> | <b>0.26 (0.16, 0.44)</b>              | <b>2.24 (1.57, 3.21)</b>        |
| <b>Physician characteristics</b>                                      |                          |                          |                          |                                       |                                 |
| Female (reference is male)                                            | 0.72 (0.58, 0.90)        | 0.78 (0.53, 1.15)        | <b>2.48 (1.59, 3.85)</b> | <b>2.19 (1.60, 3.01)</b>              | 1.09 (0.84, 1.41)               |
| IMG (reference is graduate of Canadian school)                        | 0.91 (0.64, 1.31)        | 1.50 (0.89, 2.54)        | 1.40 (0.71, 2.78)        | 1.04 (0.65, 1.65)                     | <b>0.64 (0.44, 0.95)</b>        |
| <b>Age</b> (reference is age <30)                                     |                          |                          |                          |                                       |                                 |
| 30-34                                                                 | 0.95 (0.73, 1.23)        | 0.69 (0.43, 1.10)        | 1.09 (0.65, 1.84)        | 0.75 (0.52, 1.08)                     | 1.01 (0.73, 1.39)               |
| 35+                                                                   | <b>0.71 (0.49, 1.03)</b> | 1.05 (0.59, 1.87)        | 0.92 (0.47, 1.80)        | 0.95 (0.57, 1.59)                     | <b>0.65 (0.44, 0.96)</b>        |
| <b>Childhood environment</b> (reference is inner city/urban/suburban) |                          |                          |                          |                                       |                                 |
| Small town                                                            | 0.95 (0.71, 1.28)        | 0.92 (0.53, 1.62)        | <b>0.54 (0.31, 0.93)</b> | <b>0.62 (0.41, 0.93)</b>              | 0.93 (0.66, 1.30)               |
| Rural/remote/isolated                                                 | 0.84 (0.60, 1.17)        | 1.55 (0.91, 2.65)        | 0.71 (0.36, 1.42)        | 1.09 (0.63, 1.88)                     | 1.19 (0.80, 1.77)               |
| Mixed                                                                 | <b>1.81 (1.18, 2.79)</b> | 0.98 (0.43, 2.23)        | <b>0.44 (0.21, 0.93)</b> | <b>0.43 (0.24, 0.75)</b>              | 1.16 (0.69, 1.94)               |
| <b>Intention for rural practice</b>                                   |                          |                          |                          |                                       |                                 |
| Rural practice somewhat/highly likely (reference is neutral/unlikely) | 1.13 (0.90, 1.42)        | 1.28 (0.85, 1.93)        | 1.26 (0.79, 2.02)        | <b>1.41 (1.01, 1.97)</b>              | <b>1.61 (1.24, 2.09)</b>        |

**Note:** Estimates significant at  $p \leq 0.05$  are indicated in bold. Estimates for category capturing missing responses/"prefer not to answer" not shown.

1  
2  
3  
4  
5  
6  
7  
8  
9  
10  
11  
12  
13  
14  
15  
16  
17  
18  
19  
20  
21  
22  
23  
24  
25  
26  
27  
28  
29  
30  
31  
32  
33  
34  
35  
36  
37  
38  
39  
40  
41  
42  
43  
44  
45  
46  
47

**Appendix 2 (continued).** Results of multivariable logistic regression exploring odds of practice intentions (OR, 95% CI)

|                                                                       | Care across the life cycle | Intrapartum care         | Mental health care       | Chronic disease management | Palliative care/end of life care |
|-----------------------------------------------------------------------|----------------------------|--------------------------|--------------------------|----------------------------|----------------------------------|
| <b>Region of residency</b> (reference is Ontario)                     |                            |                          |                          |                            |                                  |
| Western Canada                                                        | 0.72 (0.45, 1.15)          | <b>1.83 (1.40, 2.40)</b> | 1.26 (0.84, 1.91)        | 1.08 (0.63, 1.83)          | <b>2.61 (1.99, 3.42)</b>         |
| Atlantic Canada                                                       | <b>0.31 (0.14, 0.68)</b>   | 1.48 (0.85, 2.58)        | 1.13 (0.45, 2.82)        | 0.54 (0.20, 1.45)          | <b>2.32 (1.26, 4.27)</b>         |
| Quebec                                                                | 0.78 (0.44, 1.38)          | <b>1.50 (1.09, 2.07)</b> | 1.05 (0.64, 1.71)        | 0.86 (0.46, 1.61)          | <b>2.05 (1.49, 2.83)</b>         |
| <b>Physician characteristics</b>                                      |                            |                          |                          |                            |                                  |
| Female (reference is male)                                            | <b>1.96 (1.38, 2.80)</b>   | <b>2.64 (2.10, 3.32)</b> | <b>1.80 (1.30, 2.50)</b> | <b>2.24 (1.48, 3.38)</b>   | 0.84 (0.70, 1.06)                |
| IMG (reference is graduate of Canadian school)                        | 1.79 (0.98, 3.27)          | 0.96 (0.69, 1.34)        | 0.78 (0.48, 1.27)        | 1.82 (0.82, 4.05)          | 0.89 (0.63, 1.27)                |
| <b>Age</b> (reference is age <30)                                     |                            |                          |                          |                            |                                  |
| 30-34                                                                 | 0.99 (0.64, 1.55)          | 0.91 (0.70, 1.18)        | 0.88 (0.59, 1.32)        | 1.18 (0.71, 1.96)          | 1.04 (0.79, 1.37)                |
| 35+                                                                   | 0.64 (0.37, 1.10)          | 1.20 (0.84, 1.70)        | 0.70 (0.42, 1.14)        | 1.13 (0.57, 2.23)          | 0.83 (0.58, 1.20)                |
| <b>Childhood environment</b> (reference is inner city/urban/suburban) |                            |                          |                          |                            |                                  |
| Small town                                                            | 1.05 (0.63, 1.75)          | 0.82 (0.61, 1.10)        | 0.87 (0.55, 1.37)        | 0.93 (0.52, 1.66)          | <b>1.39 (1.03, 1.89)</b>         |
| Rural/remote/isolated                                                 | 0.83 (0.48, 1.45)          | 1.10 (0.81, 1.51)        | 0.82 (0.49, 1.37)        | 0.75 (0.40, 1.42)          | <b>1.43 (1.01, 2.02)</b>         |
| Mixed                                                                 | 0.62 (0.33, 1.17)          | 1.19 (0.76, 1.86)        | 0.64 (0.36, 1.15)        | 0.54 (0.26, 1.14)          | 0.99 (0.63, 1.57)                |
| <b>Intention for rural practice</b>                                   |                            |                          |                          |                            |                                  |
| Rural practice somewhat/highly likely (reference is neutral/unlikely) | 2.01 (1.37, 2.95)          | <b>1.82 (1.45, 2.28)</b> | 2.07 (1.46, 2.93)        | <b>1.89 (1.21, 2.95)</b>   | <b>2.22 (1.77, 2.79)</b>         |

**Note:** Estimates significant at p<0.05 are indicated in bold. Estimates for category capturing missing responses/"prefer not to answer" not shown.

**Appendix 2 (continued).** Results of multivariable logistic regression exploring odds of practice intentions (OR, 95% CI)

|                                                                                | Office-based<br>clinical<br>procedures | In-hospital<br>clinical<br>procedures | Emergency<br>departments | In-hospital              | Care in the<br>home      |
|--------------------------------------------------------------------------------|----------------------------------------|---------------------------------------|--------------------------|--------------------------|--------------------------|
| <b>Region of residency</b> (reference is Ontario)                              |                                        |                                       |                          |                          |                          |
| Western Canada                                                                 | <b>2.22 (1.55, 3.17)</b>               | <b>1.51 (1.14, 2.00)</b>              | <b>1.85 (1.39, 2.47)</b> | 1.07 (0.82, 1.41)        | <b>1.84 (1.41, 2.40)</b> |
| Atlantic Canada                                                                | 0.82 (0.42, 1.60)                      | 0.84 (0.47, 1.51)                     | 1.51 (0.85, 2.70)        | 1.37 (0.73, 2.58)        | <b>2.17 (1.26, 3.73)</b> |
| Quebec                                                                         | 1.25 (0.84, 1.87)                      | 0.96 (0.68, 1.35)                     | 1.10 (0.78, 1.55)        | 0.59 (0.43, 0.82)        | <b>2.54 (1.86, 3.48)</b> |
| <b>Physician characteristics</b>                                               |                                        |                                       |                          |                          |                          |
| Female<br>(reference is male)                                                  | 1.25 (0.94, 1.66)                      | <b>0.47 (0.37, 0.58)</b>              | 0.40 (0.32, 0.51)        | 0.70 (0.56, 0.88)        | 1.07 (0.86, 1.32)        |
| IMG (reference is graduate<br>of Canadian school)                              | 1.53 (0.93, 2.53)                      | <b>0.70 (0.50, 1.00)</b>              | 0.80 (0.56, 1.13)        | 0.98 (0.69, 1.38)        | <b>1.39 (1.01, 1.92)</b> |
| <b>Age</b><br>(reference is age <30)                                           |                                        |                                       |                          |                          |                          |
| 30-34                                                                          | 1.08 (0.76, 1.53)                      | 1.14 (0.87, 1.49)                     | 1.07 (0.81, 1.41)        | 1.09 (0.83, 1.43)        | 0.94 (0.73, 1.21)        |
| 35+                                                                            | 0.83 (0.52, 1.31)                      | 0.77 (0.53, 1.12)                     | 0.82 (0.56, 1.19)        | 0.78 (0.54, 1.13)        | 0.96 (0.68, 1.36)        |
| <b>Childhood environment</b><br>(reference is inner<br>city/urban/suburban)    |                                        |                                       |                          |                          |                          |
| Small town                                                                     | 1.36 (0.91, 2.03)                      | 1.28 (0.95, 1.73)                     | <b>1.53 (1.13, 2.07)</b> | 1.21 (0.89, 1.64)        | 1.21 (0.92, 1.61)        |
| Rural/remote/isolated                                                          | 1.00 (0.65, 1.54)                      | <b>1.84 (1.33, 2.54)</b>              | <b>1.57 (1.13, 2.18)</b> | <b>1.61 (1.13, 2.30)</b> | 1.35 (0.99, 1.84)        |
| Mixed                                                                          | 0.89 (0.51, 1.55)                      | <b>1.83 (1.15, 2.90)</b>              | <b>1.64 (1.02, 2.63)</b> | 0.73 (0.46, 1.15)        | 0.99 (0.63, 1.54)        |
| <b>Intention for rural practice</b>                                            |                                        |                                       |                          |                          |                          |
| Rural practice<br>somewhat/highly likely<br>(reference is<br>neutral/unlikely) | <b>2.01 (1.50, 2.71)</b>               | <b>4.63 (3.62, 5.90)</b>              | <b>5.85 (4.57, 7.50)</b> | <b>3.96 (3.15, 4.98)</b> | <b>1.99 (1.60, 2.48)</b> |

**Note:** Estimates significant at  $p \leq 0.05$  are indicated in bold. Estimates for category capturing missing responses/"prefer not to answer" not shown.

1  
2  
3  
4  
5  
6  
7  
8  
9  
10  
11  
12  
13  
14  
15  
16  
17  
18  
19  
20  
21  
22  
23  
24  
25  
26  
27  
28  
29  
30  
31  
32  
33  
34  
35  
36  
37  
38  
39  
40  
41  
42  
43  
44  
45  
46  
47

**Appendix 2 (continued).** Results of multivariable logistic regression exploring odds of practice intentions (OR, 95% CI)

|                                                                       | Long-term care facilities | Marginalized, disadvantaged and vulnerable | Rural populations        | Elderly populations      | First Nations             |
|-----------------------------------------------------------------------|---------------------------|--------------------------------------------|--------------------------|--------------------------|---------------------------|
| <b>Region of residency</b> (reference is Ontario)                     |                           |                                            |                          |                          |                           |
| Western Canada                                                        | <b>2.61 (2.00, 3.41)</b>  | <b>4.22 (3.21, 5.55)</b>                   | <b>1.57 (1.21, 2.03)</b> | 1.15 (0.72, 1.83)        | <b>9.05 (6.62, 12.38)</b> |
| Atlantic Canada                                                       | 1.49 (0.86, 2.57)         | <b>2.99 (1.69, 5.28)</b>                   | <b>2.21 (1.23, 3.97)</b> | 1.07 (0.37, 3.06)        | 1.61 (0.89, 2.93)         |
| Quebec                                                                | <b>1.47 (1.07, 2.02)</b>  | <b>2.06 (1.50, 2.83)</b>                   | <b>1.64 (1.20, 2.23)</b> | 1.02 (0.58, 1.80)        | <b>2.42 (1.69, 3.45)</b>  |
| <b>Physician characteristics</b>                                      |                           |                                            |                          |                          |                           |
| Female (reference is male)                                            | 0.93 (0.75, 1.16)         | 1.16 (0.92, 1.45)                          | <b>0.82 (0.66, 1.02)</b> | 1.33 (0.91, 1.96)        | 0.98 (0.77, 1.25)         |
| IMG (reference is graduate of Canadian school)                        | <b>1.38 (1.00, 1.91)</b>  | 1.02 (0.72, 1.45)                          | 1.16 (0.82, 1.62)        | 1.57 (0.81, 3.04)        | <b>0.70 (0.49, 1.00)</b>  |
| <b>Age</b> (reference is age <30)                                     |                           |                                            |                          |                          |                           |
| 30-34                                                                 | 0.87 (0.67, 1.12)         | 1.14 (0.88, 1.49)                          | 1.37 (1.06, 1.77)        | 0.83 (0.53, 1.31)        | 0.99 (0.75, 1.31)         |
| 35+                                                                   | 1.14 (0.81, 1.61)         | 1.00 (0.69, 1.43)                          | 1.13 (0.80, 1.60)        | 0.53 (0.30, 0.94)        | 1.00 (0.68, 1.47)         |
| <b>Childhood environment</b> (reference is inner city/urban/suburban) |                           |                                            |                          |                          |                           |
| Small town                                                            | 1.08 (0.81, 1.44)         | 0.77 (0.57, 1.03)                          | <b>2.17 (1.63, 2.89)</b> | 1.03 (0.59, 1.79)        | 0.92 (0.67, 1.27)         |
| Rural/remote/isolated                                                 | 1.20 (0.88, 1.64)         | 0.84 (0.60, 1.16)                          | 5.00 (3.50, 7.15)        | 0.70 (0.39, 1.27)        | 1.18 (0.83, 1.68)         |
| Mixed                                                                 | 0.87 (0.55, 1.36)         | <b>0.60 (0.38, 0.97)</b>                   | <b>1.59 (1.02, 2.48)</b> | 0.57 (0.29, 1.14)        | 1.21 (0.73, 2.01)         |
| <b>Intention for rural practice</b>                                   |                           |                                            |                          |                          |                           |
| Rural practice somewhat/highly likely (reference is neutral/unlikely) | <b>2.12 (1.70, 2.65)</b>  | <b>3.27 (2.60, 4.12)</b>                   | N/A                      | <b>3.90 (2.55, 5.97)</b> | <b>4.88 (3.78, 6.31)</b>  |

**Note:** Estimates significant at p≤0.05 are indicated in bold. Estimates for category capturing missing responses/"prefer not to answer" not shown.

STROBE Statement—Checklist of items that should be included in reports of *cross-sectional studies*

|                              | Item No | Recommendation                                                                                                                                                                                               | Page No       |
|------------------------------|---------|--------------------------------------------------------------------------------------------------------------------------------------------------------------------------------------------------------------|---------------|
| <b>Title and abstract</b>    | 1       | (a) Indicate the study's design with a commonly used term in the title or the abstract                                                                                                                       | 2             |
|                              |         | (b) Provide in the abstract an informative and balanced summary of what was done and what was found                                                                                                          | 2             |
| <b>Introduction</b>          |         |                                                                                                                                                                                                              |               |
| Background/rationale         | 2       | Explain the scientific background and rationale for the investigation being reported                                                                                                                         | 3             |
| Objectives                   | 3       | State specific objectives, including any prespecified hypotheses                                                                                                                                             | 4             |
| <b>Methods</b>               |         |                                                                                                                                                                                                              |               |
| Study design                 | 4       | Present key elements of study design early in the paper                                                                                                                                                      | 4             |
| Setting                      | 5       | Describe the setting, locations, and relevant dates, including periods of recruitment, exposure, follow-up, and data collection                                                                              | 4             |
| Participants                 | 6       | (a) Give the eligibility criteria, and the sources and methods of selection of participants                                                                                                                  | 4             |
| Variables                    | 7       | Clearly define all outcomes, exposures, predictors, potential confounders, and effect modifiers. Give diagnostic criteria, if applicable                                                                     | 4-5           |
| Data sources/<br>measurement | 8*      | For each variable of interest, give sources of data and details of methods of assessment (measurement). Describe comparability of assessment methods if there is more than one group                         | 4             |
| Bias                         | 9       | Describe any efforts to address potential sources of bias                                                                                                                                                    |               |
| Study size                   | 10      | Explain how the study size was arrived at                                                                                                                                                                    | 6             |
| Quantitative variables       | 11      | Explain how quantitative variables were handled in the analyses. If applicable, describe which groupings were chosen and why                                                                                 | 5             |
| Statistical methods          | 12      | (a) Describe all statistical methods, including those used to control for confounding                                                                                                                        | 5             |
|                              |         | (b) Describe any methods used to examine subgroups and interactions                                                                                                                                          | 5             |
|                              |         | (c) Explain how missing data were addressed                                                                                                                                                                  | 5             |
|                              |         | (d) If applicable, describe analytical methods taking account of sampling strategy                                                                                                                           | n/a           |
|                              |         | (e) Describe any sensitivity analyses                                                                                                                                                                        | 6             |
| <b>Results</b>               |         |                                                                                                                                                                                                              |               |
| Participants                 | 13*     | (a) Report numbers of individuals at each stage of study—eg numbers potentially eligible, examined for eligibility, confirmed eligible, included in the study, completing follow-up, and analysed            | 6             |
|                              |         | (b) Give reasons for non-participation at each stage                                                                                                                                                         | n/a           |
|                              |         | (c) Consider use of a flow diagram                                                                                                                                                                           | n/a           |
| Descriptive data             | 14*     | (a) Give characteristics of study participants (eg demographic, clinical, social) and information on exposures and potential confounders                                                                     | 6             |
|                              |         | (b) Indicate number of participants with missing data for each variable of interest                                                                                                                          | 6,8           |
| Outcome data                 | 15*     | Report numbers of outcome events or summary measures                                                                                                                                                         | 7             |
| Main results                 | 16      | (a) Give unadjusted estimates and, if applicable, confounder-adjusted estimates and their precision (eg, 95% confidence interval). Make clear which confounders were adjusted for and why they were included | 6,7,<br>13,14 |

|                          |    |                                                                                                                                                                            |         |
|--------------------------|----|----------------------------------------------------------------------------------------------------------------------------------------------------------------------------|---------|
|                          |    | (b) Report category boundaries when continuous variables were categorized                                                                                                  | 4,13,14 |
|                          |    | (c) If relevant, consider translating estimates of relative risk into absolute risk for a meaningful time period                                                           | n/a     |
| Other analyses           | 17 | Report other analyses done—eg analyses of subgroups and interactions, and sensitivity analyses                                                                             | 8       |
| <b>Discussion</b>        |    |                                                                                                                                                                            |         |
| Key results              | 18 | Summarise key results with reference to study objectives                                                                                                                   | 8       |
| Limitations              | 19 | Discuss limitations of the study, taking into account sources of potential bias or imprecision. Discuss both direction and magnitude of any potential bias                 | 9       |
| Interpretation           | 20 | Give a cautious overall interpretation of results considering objectives, limitations, multiplicity of analyses, results from similar studies, and other relevant evidence | 10      |
| Generalisability         | 21 | Discuss the generalisability (external validity) of the study results                                                                                                      | 11      |
| <b>Other information</b> |    |                                                                                                                                                                            |         |
| Funding                  | 22 | Give the source of funding and the role of the funders for the present study and, if applicable, for the original study on which the present article is based              | 1       |

\*Give information separately for exposed and unexposed groups.

**Note:** An Explanation and Elaboration article discusses each checklist item and gives methodological background and published examples of transparent reporting. The STROBE checklist is best used in conjunction with this article (freely available on the Web sites of PLoS Medicine at <http://www.plosmedicine.org/>, Annals of Internal Medicine at <http://www.annals.org/>, and Epidemiology at <http://www.epidem.com/>). Information on the STROBE Initiative is available at [www.strobe-statement.org](http://www.strobe-statement.org).
